# Supplementary material for: Genomic basis of the giga-chromosomes and giga-genome of tree peony Paeonia ostii
Source: PubMed Central journal article supplement (PMC9705720; doi:10.1038/s41467-022-35063-1), 2022-11-28
Supplement: 41467_2022_35063_MOESM1_ESM.pdf [file 41467_2022_35063_MOESM1_ESM.pdf]

**Genomic basis of the giga-chromosomes and giga-genome of tree**

**peony *Paeonia ostii***

Yuan *et al.*

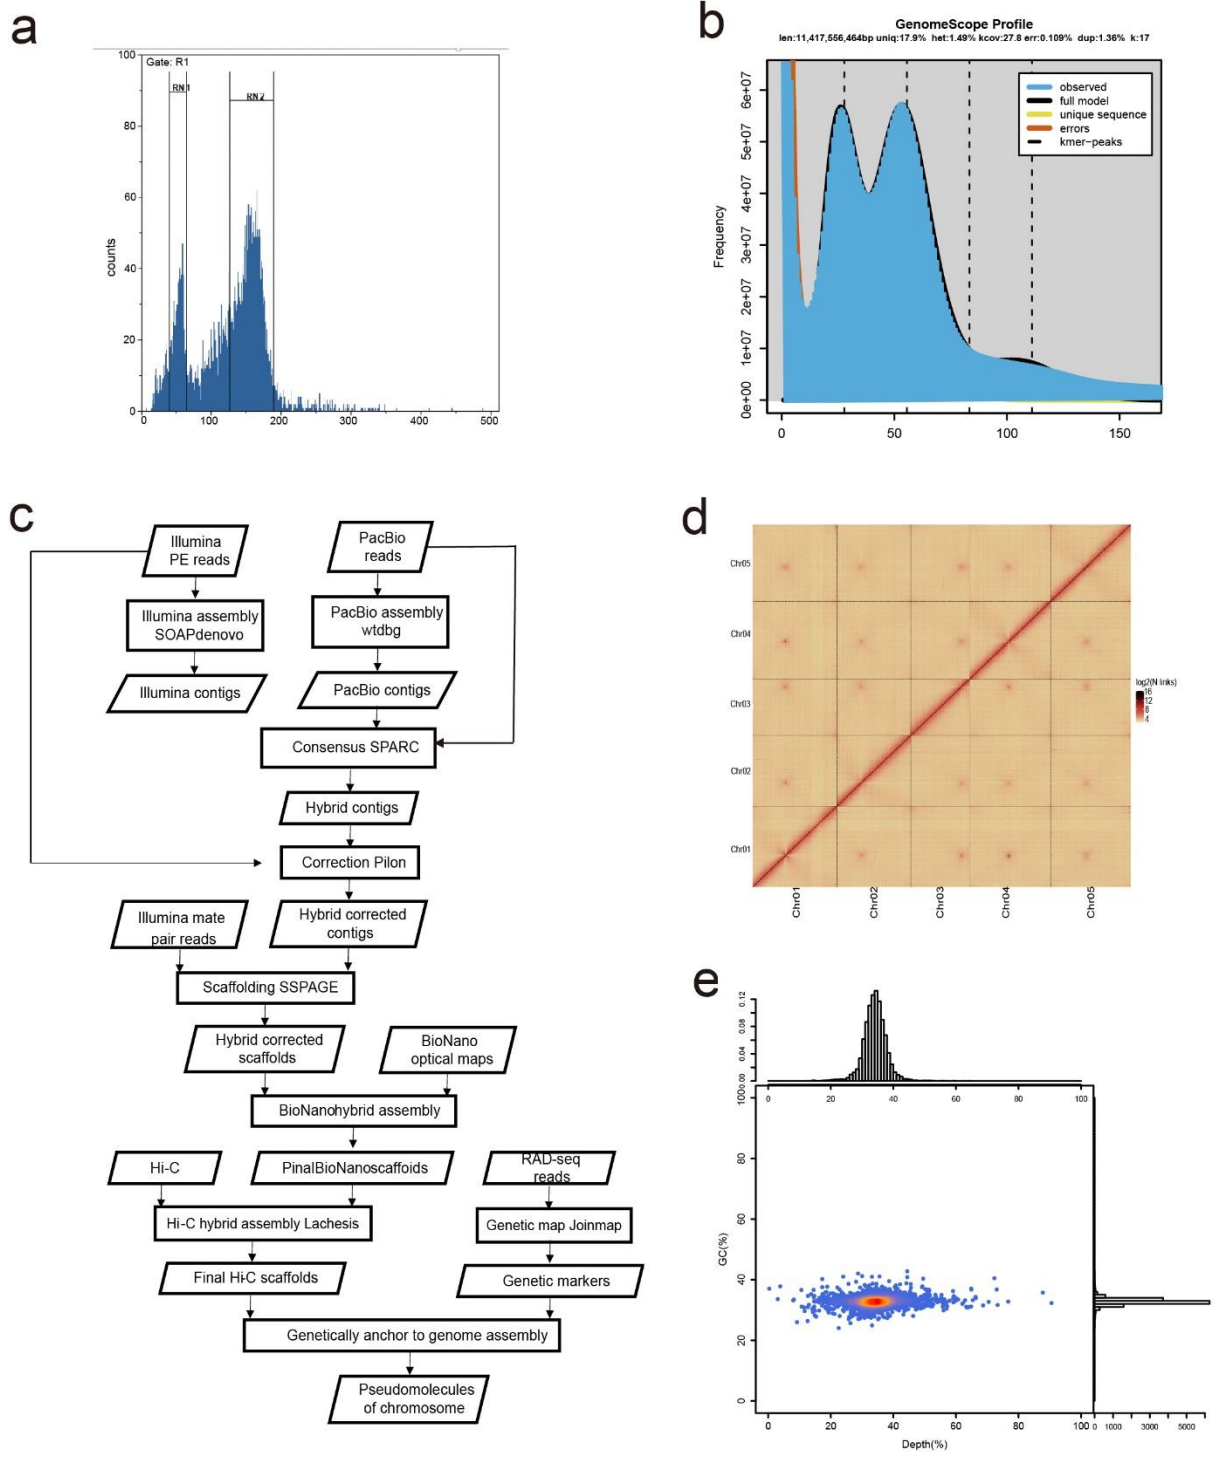

**Supplementary Fig. 1. Genome assembly of *P. ostii*.** **a**, Estimation of *P. ostii* genome size by flow cytometry analysis. **b**, K-mer analysis of *P. ostii* genome by GenomeScope. The heterozygosity was estimated to be 1.5%. **c**, The genome assembly pipeline of *P. ostii* by a combination of sequencing data. **d**, Overview of the Hi-C heatmap of the *P. ostii* genome showing genome-wide all-by-all interactions with in 750 kb. **e**, GC ratio in relation to sequencing depth. Source data are provided as a Source Data file.

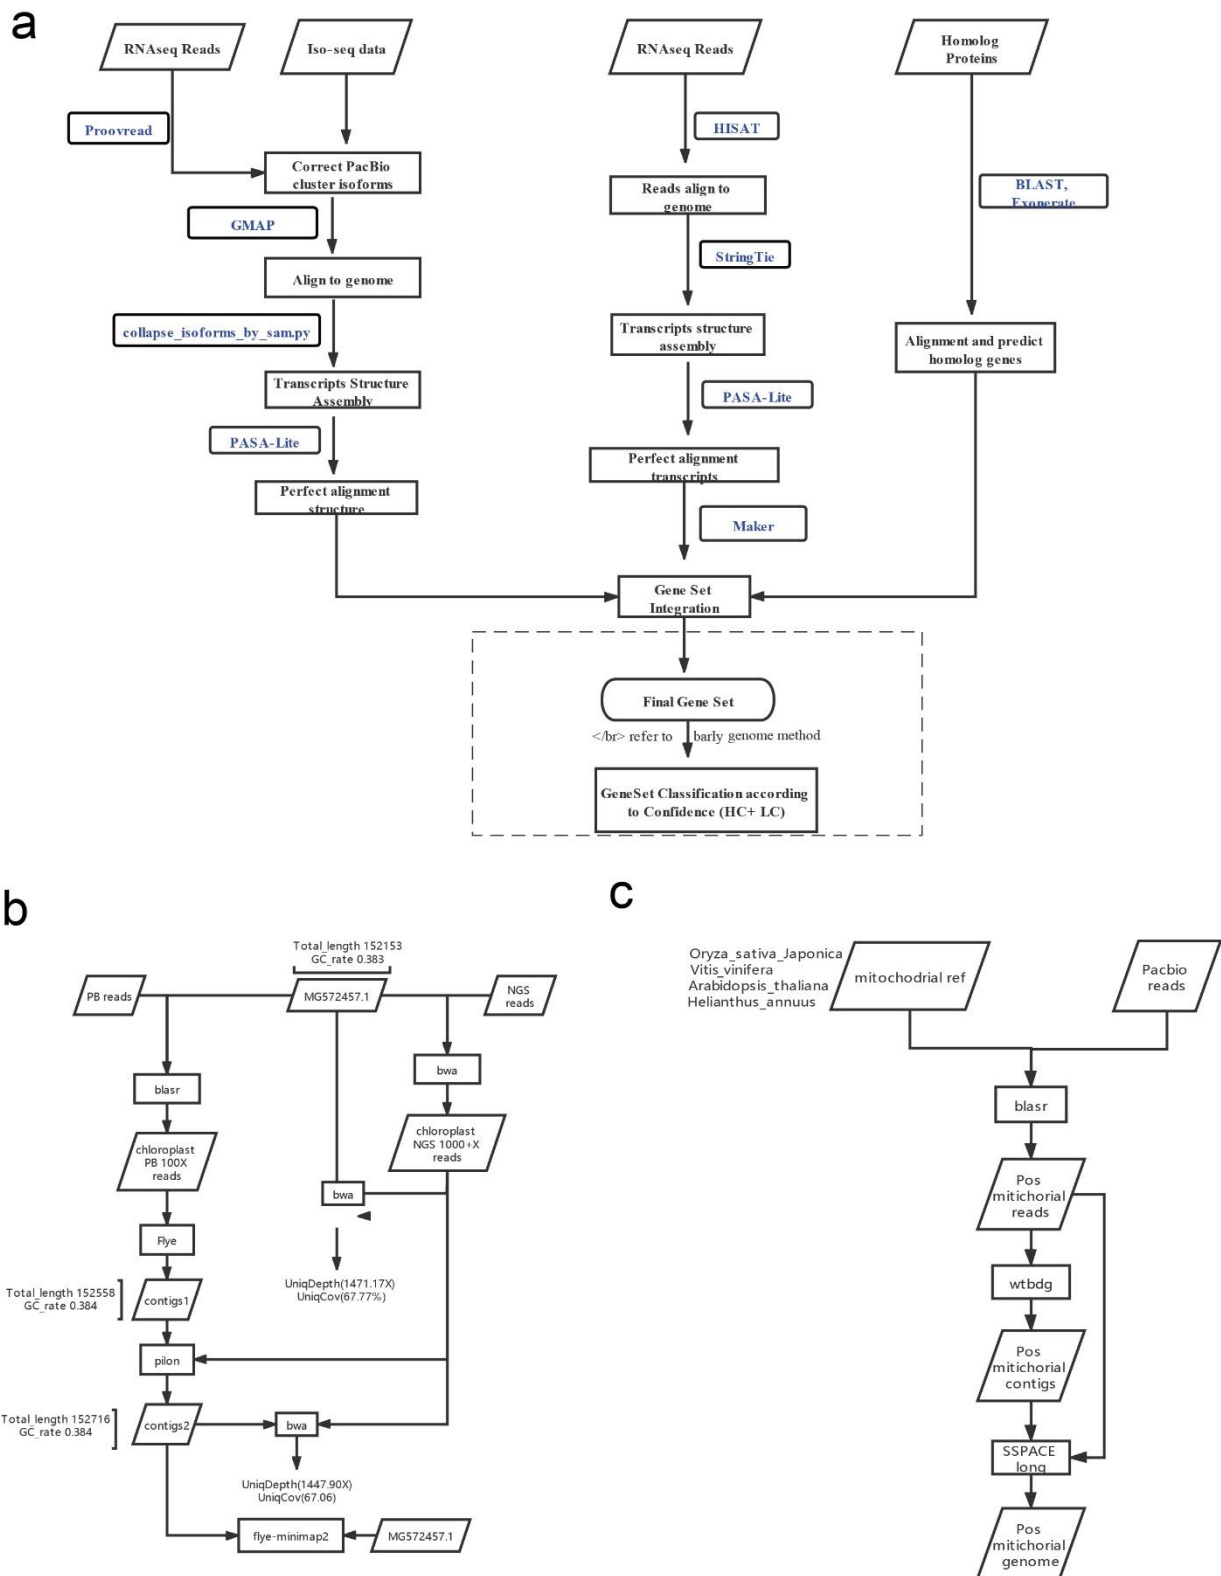

**Supplementary Fig. 2. Genome annotation and organelle assembly of *P. ostii*.** **a**, The annotation pipeline of the tree peony genome. **b**, The assembly pipeline of the *P. ostii* chloroplast. **c**, The assembly pipeline of *P. ostii* mitochondrial sequence.

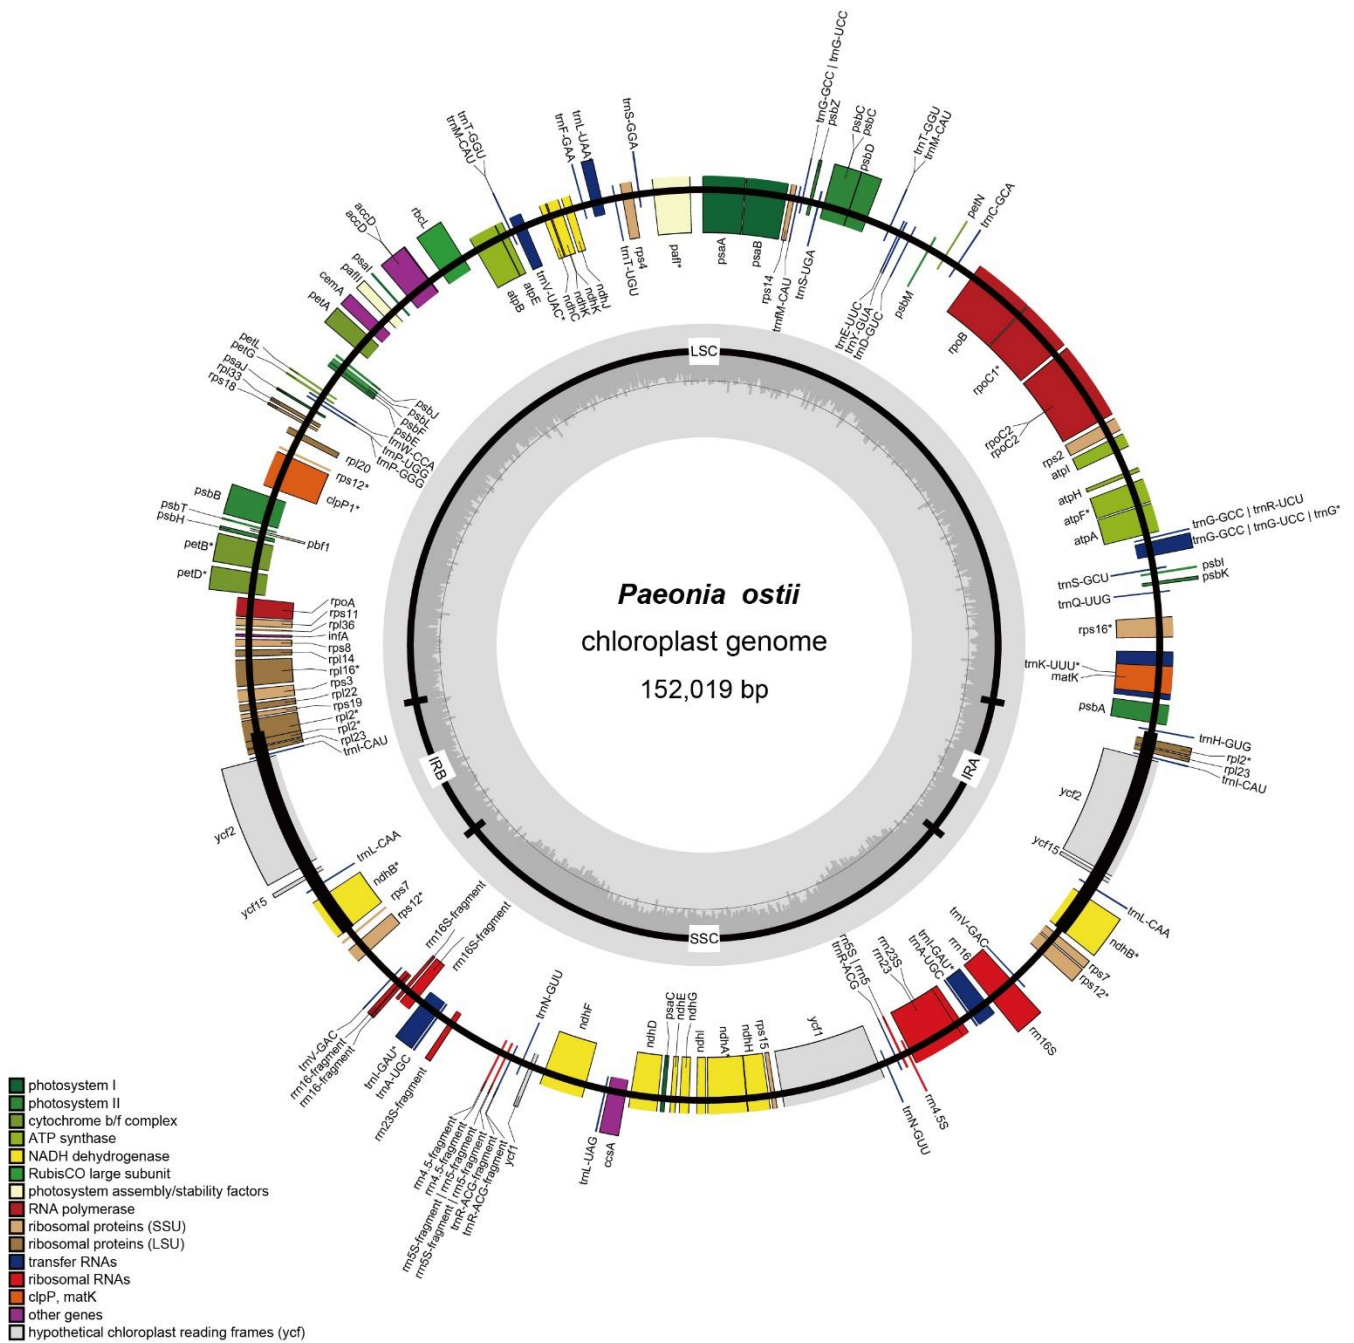

**Supplementary Fig. 3. Circos view of *P. ostii* chloroplast.** Source data are provided as a Source Data file.

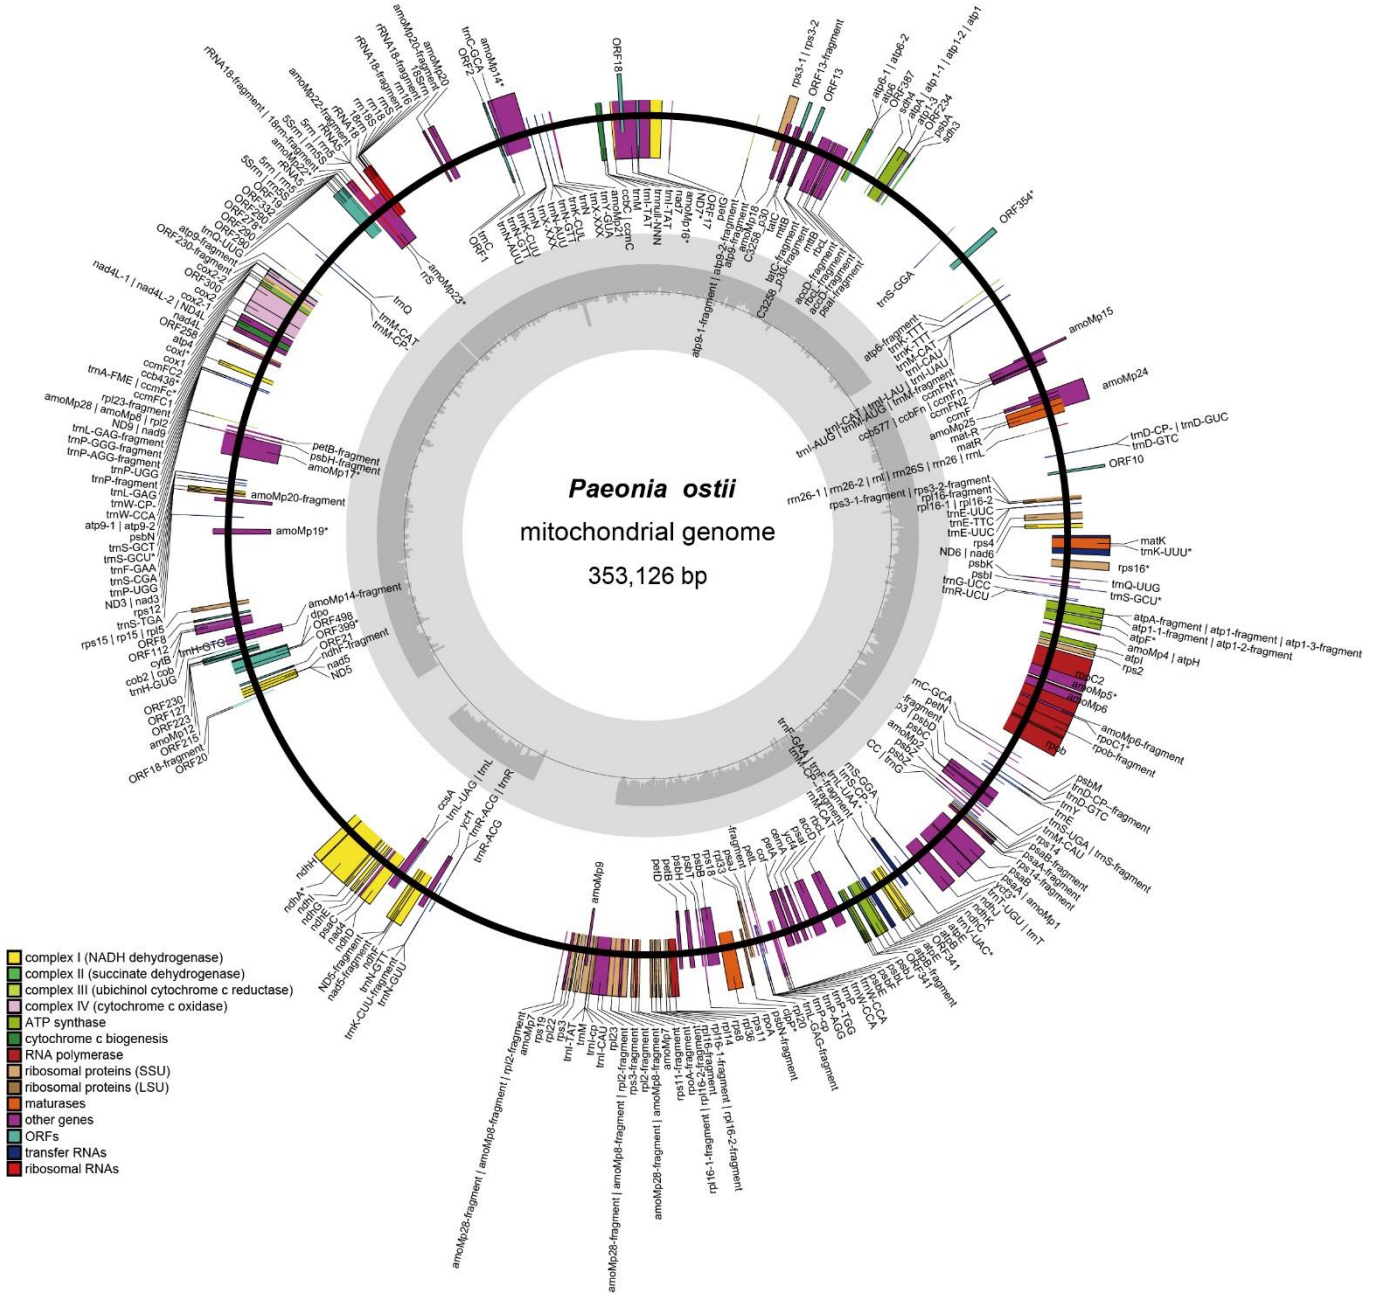

Supplementary Fig. 4. Circos view of the *P. ostii* mitochondrial genome. Source data are provided as a Source Data file.

a

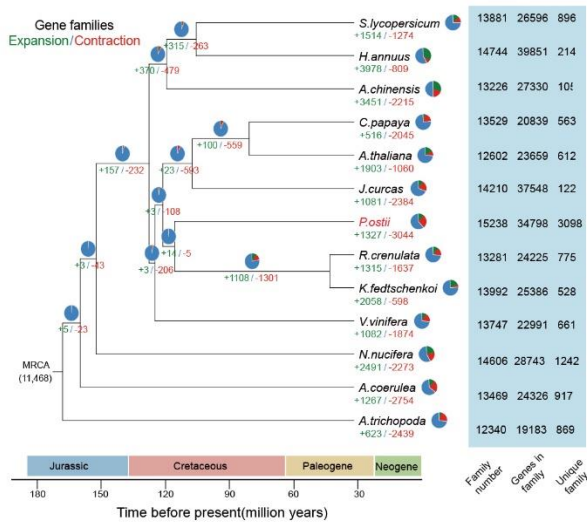

b

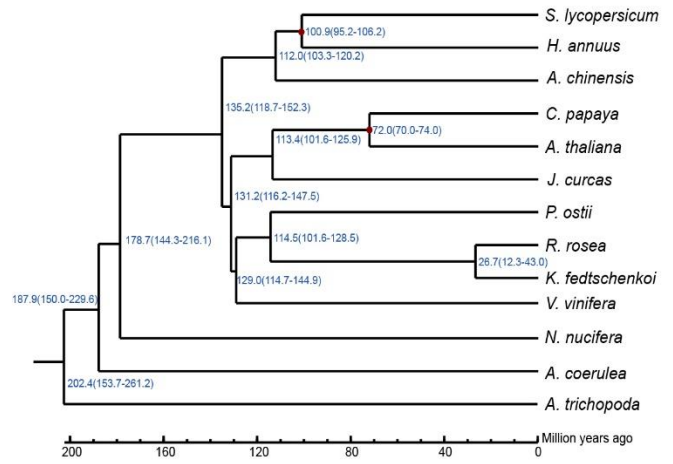

c

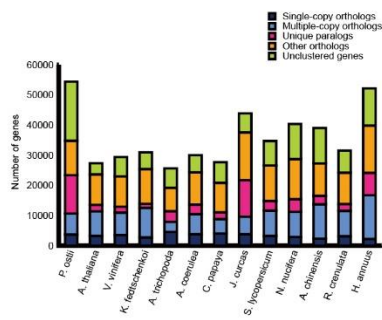

d

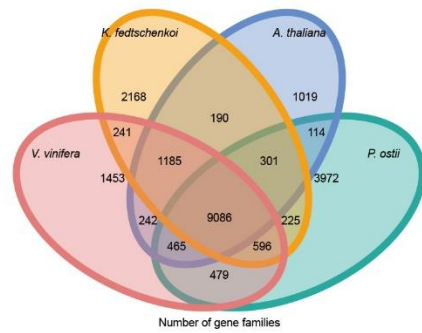

e

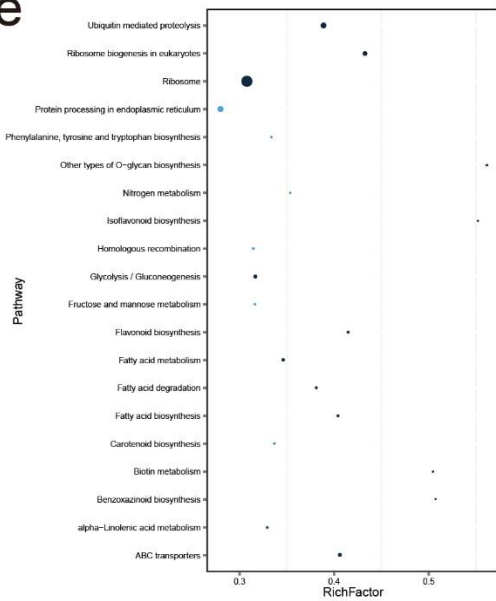

f

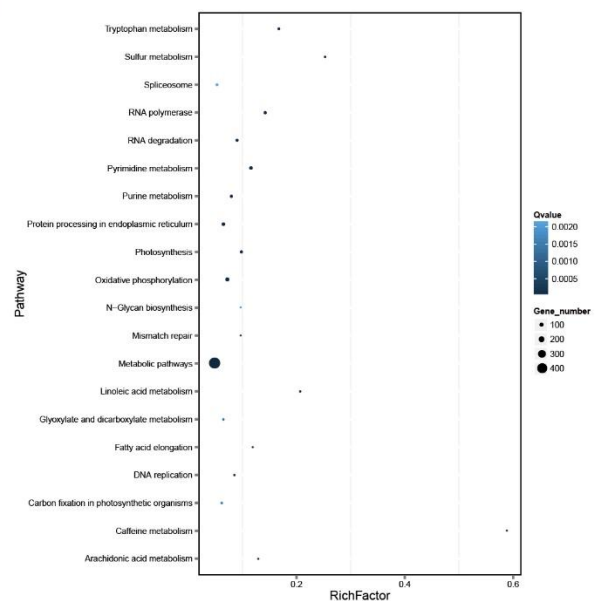

**Supplementary Fig. 5. Gene families of *P. ostii*.** **a**, Phylogenetic relationships and gene family expansion/contraction on each evolutionary branch. A total of 1327 gene families were substantially expanded, and 3044 gene families were contracted, in peony compared with other plant genomes. The corresponding proportions among the total changes are shown as pie charts. Blue portions of the pie charts represent conserved gene families. Genomes of *Amborella trichopoda*, *Aquilegia coerulea*, *Carica papaya*, *Vitis vinifera*, *Solanum lycopersicum*, *Nelumbo nucifera*, *Jatropha curcas*, *Actinidia chinensis*, *Kalanchoe fedtschenkoi*, *Helianthus annuus* and *Rhodiola crenulate* were used for the evolutionary analysis. **b**, Multispecies coalescent tree of their chloroplast genes. **c**, Gene numbers in each gene family category in 13 land plant species. **d**, Venn diagram showing shared orthologous groups among tree peony, grape, *K. fedtschenkoi* and *A. thaliana*. Numbers in circles indicate the number of genes in each cluster. **e**, KEGG pathway functional enrichment of tree peony unique gene families. The statistics for the top 20 pathways are shown. Q values represent the significance of enrichment. Circles indicate the target genes, and the size is proportional to the number of genes. **f**, The KEGG pathway functional enrichment of tree peony showed significant results related to expanded gene families. The statistics for the top 20 pathways are shown. Q values represent the significance of enrichment. Circles indicate the target genes, and the size is proportional to the number of genes. Source data are provided as a Source Data file.

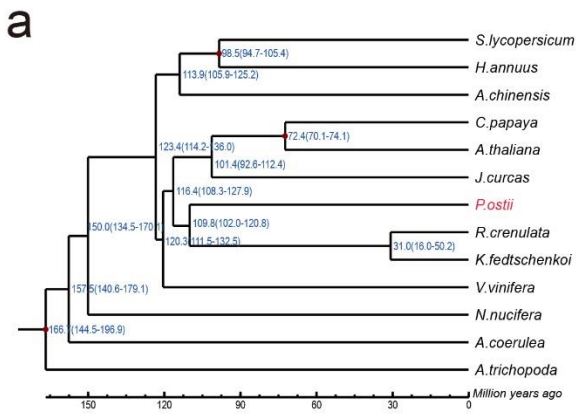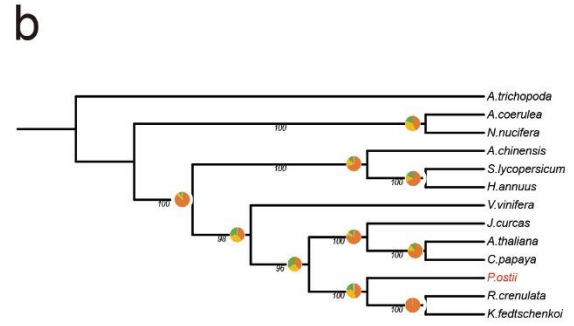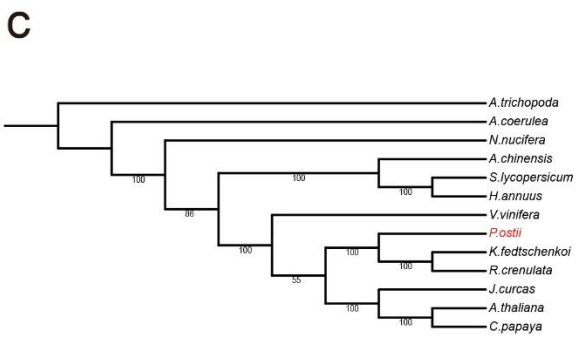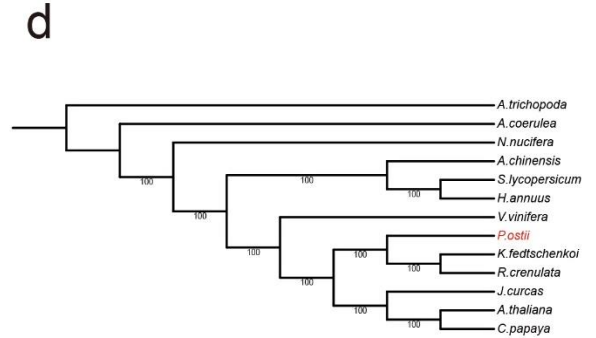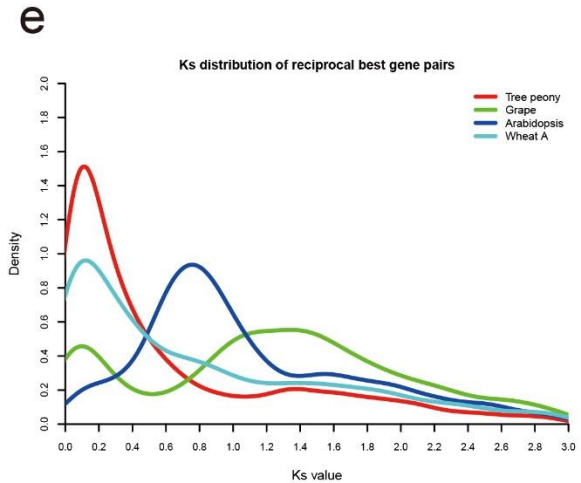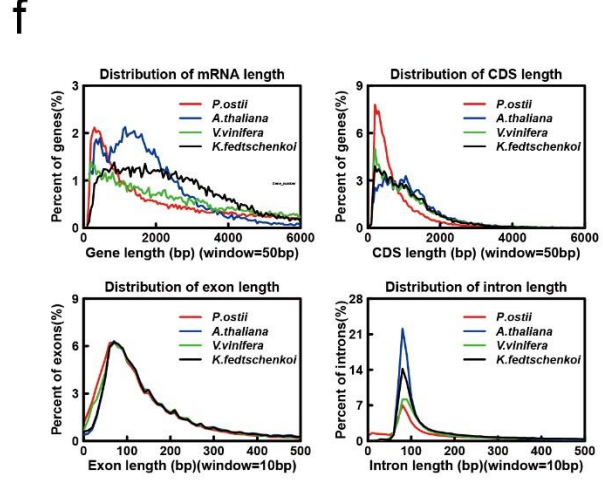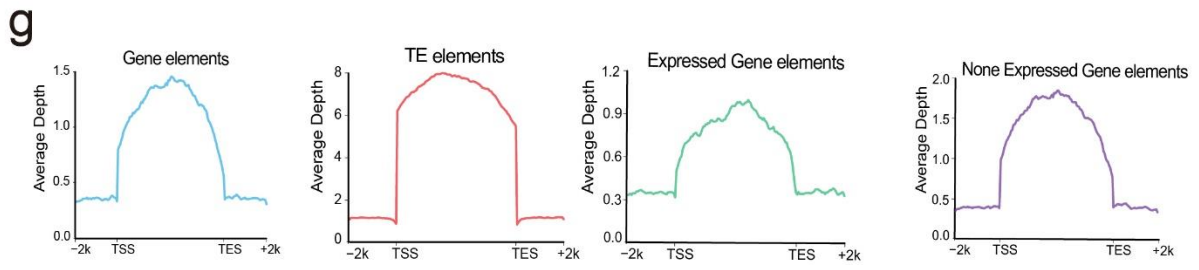



**Supplementary Fig. 6. Phylogenetics of *P. ostii*.** **a**, Estimation of *P. ostii* divergence time. The blue numbers on the nodes are divergence times from present, MYA. Red dots represent the calibration time. **b**, Multispecies coalescent tree of CDSs by the ASTRAL-based method. **c**, Multispecies coalescent tree of protein sequences by the ASTRAL-based method. **d**, Multispecies coalescent tree of CDSs by the MrBayes method. **e**, Ks distribution of tree peony, grape, *Arabidopsis* and wheat A genome. The Ks value is from reciprocal best gene pairs. **f**, The length distribution of gene elements of tree peony and three other species. **g**, CHIP-seq analysis of the average depth of gene and TE elements, as well as expressed and non-expressed genes in the peony intergenic region and the 2k bp external region.



**Supplementary Fig. 7. Genetic and genomic analysis of histones.** Phylogenetic analysis of histones H1(**a**), H2A(**b**), H2B(**c**), H3(**d**), and H4(**e**). The subfamilies of H2A and H3 are annotated. **f**, distributions of histones on the five giga-chromosomes of *P. ostii*. **g**, Variation of four amino acids from H3.1 and H3.3 in *P. ostii*, *A. thaliana*, *Z. mays* and *G. biloba*. Source data are provided as a Source Data file.

**a**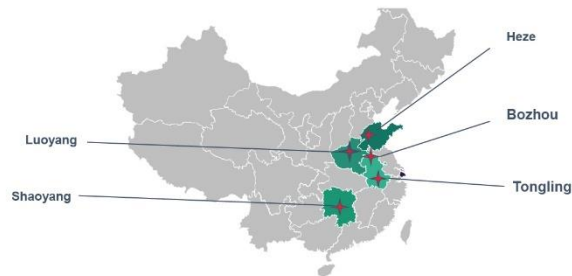**b**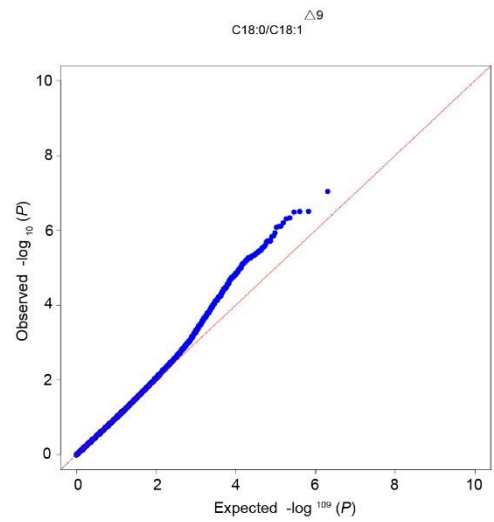**c**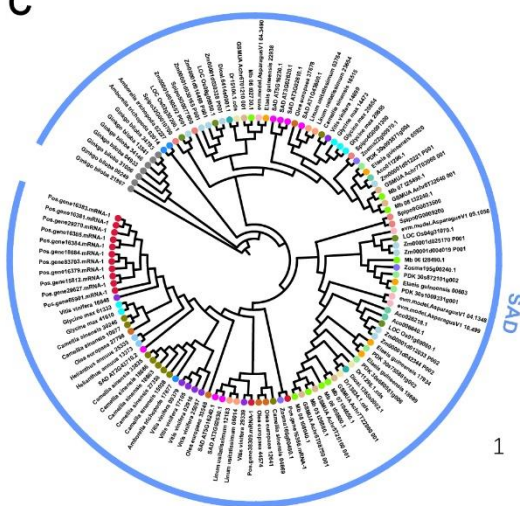

- *Paeonia ostii*
- *Amborella trichopoda*
- *Arabidopsis thaliana*
- *Camellia sinensis*
- *Glycine max*
- *Helianthus annuus*
- *Linum usitatissimum*
- *Olea europaea*
- *Vitis vinifera*
- *Ananas comosus*
- *Asparagus officinalis*
- *Dioscorea alata*
- *Dioscorea rotundata*
- *Elaeis guineensis*
- *Musa acuminata*
- *Oryza sativa*
- *Phoenix dactylifera*
- *Spirodela polytricha*
- *Zea mays*
- *Zostera marina*
- *Ginkgo biloba*

**d**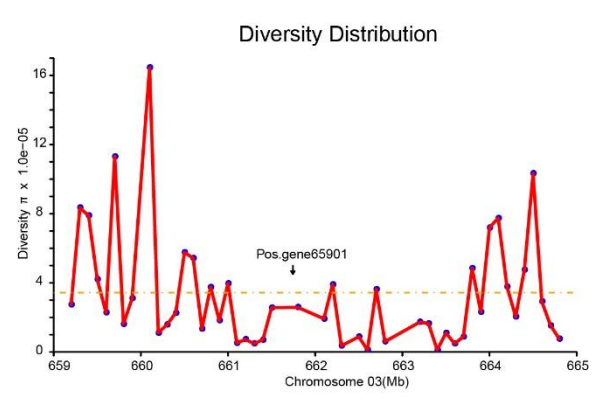**e**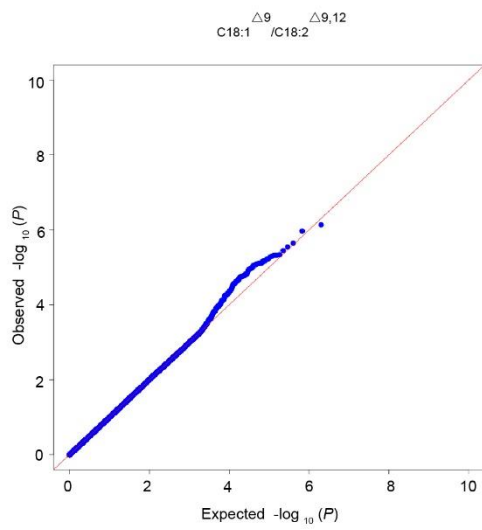**f**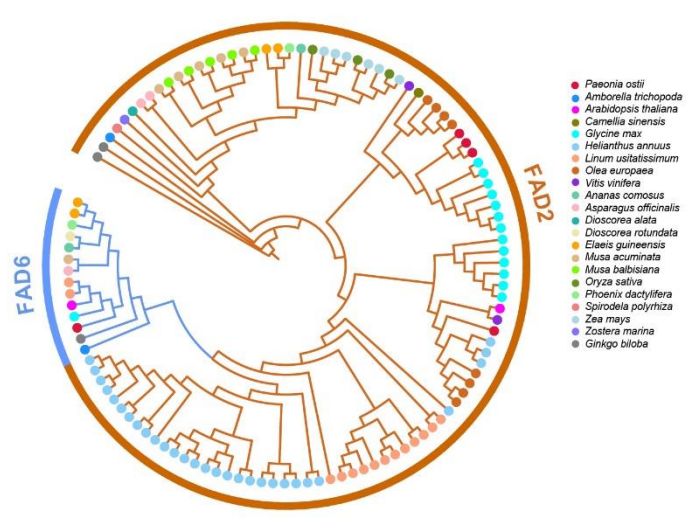

- *Paeonia ostii*
- *Amborella trichopoda*
- *Arabidopsis thaliana*
- *Camellia sinensis*
- *Glycine max*
- *Helianthus annuus*
- *Linum usitatissimum*
- *Olea europaea*
- *Vitis vinifera*
- *Ananas comosus*
- *Asparagus officinalis*
- *Dioscorea alata*
- *Dioscorea rotundata*
- *Elaeis guineensis*
- *Musa acuminata*
- *Musa balbisiana*
- *Oryza sativa*
- *Phoenix dactylifera*
- *Spirodela polytricha*
- *Zea mays*
- *Zostera marina*
- *Ginkgo biloba*

**Supplementary Fig. 8. GWAS analysis of *P. ostii* traits.** **a**, Distribution of the collected tree peony samples. The samples were mainly collected from five locations: 'Bozhou', 'Heze', 'Luoyang', 'Shaoyang' and 'Tongling'. **b**, Quantile-quantile plot of the  $-\log_{10}(p)$  of the markers for the trait C18:0/C18:1 $\Delta^9$ . **c**, Phylogenetic analysis of *SAD* genes in *P. ostii* and representative plants. **d**, Diversity distribution of genes in a 6 Mb region of chromosome 3. **e**, Quantile-quantile plot of the  $-\log_{10}(p)$  of the markers for the trait C18:1 $\Delta^9$ /C18:2 $\Delta^9,12$ . **f**, Phylogenetic analysis of *FAD2* genes in *P. ostii* and representative plants. Source data are provided as a Source Data file.

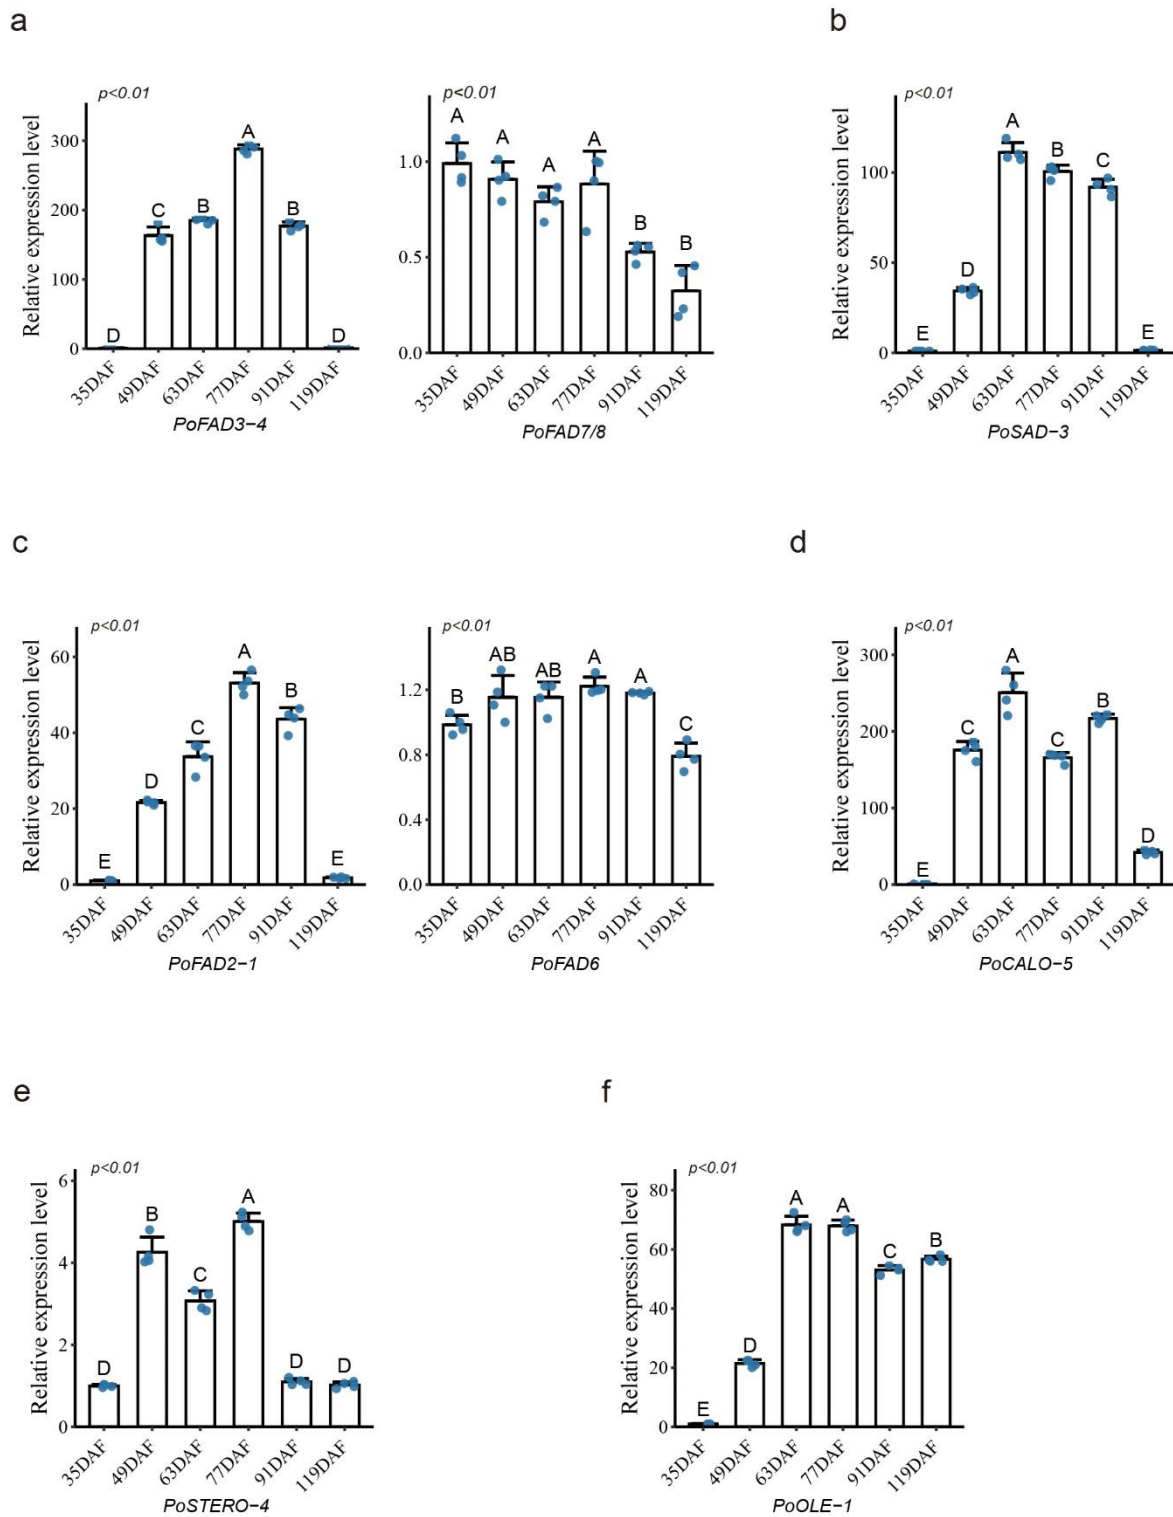

**Supplementary Fig. 9. Real-time qPCR validation of the expression of fatty acid biosynthesis-related genes (a-f), at varying scales.** Three replicates for each gene were performed. Data are presented as mean values +/- SEM.

**a**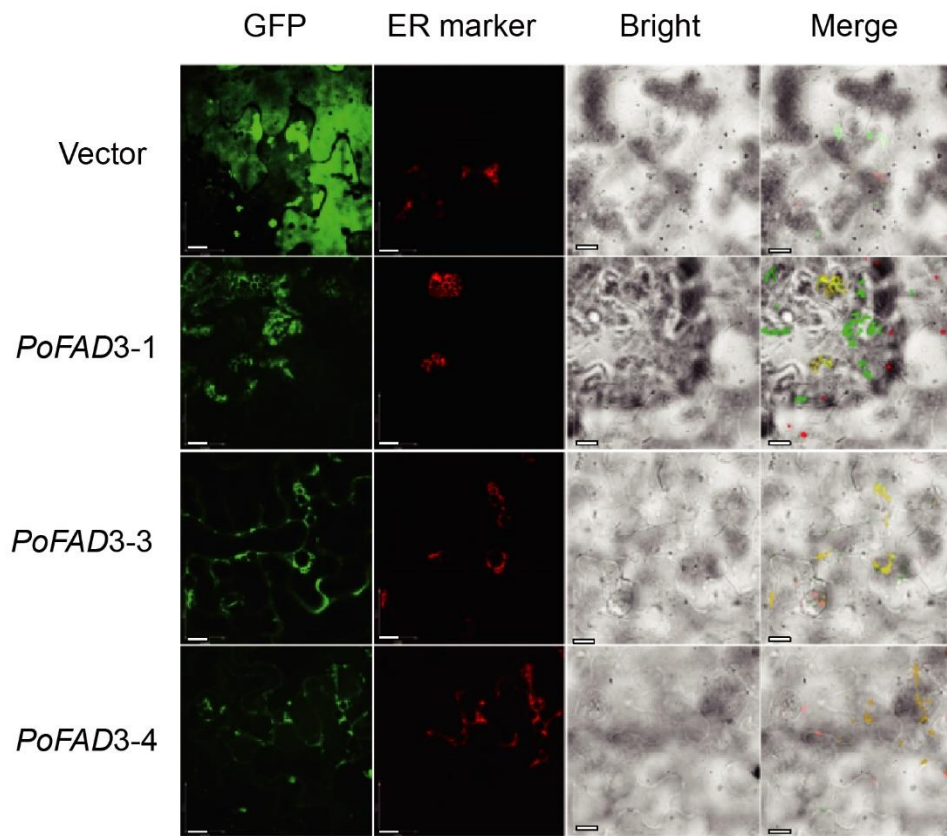**b**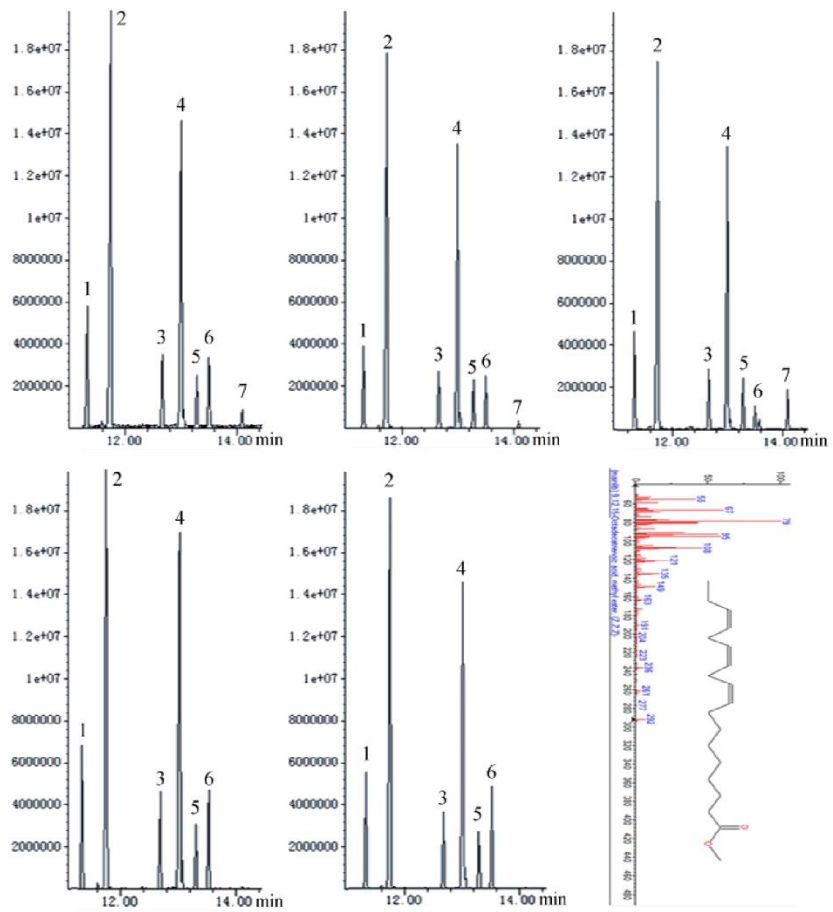

**Supplementary Fig. 10. Validation of omega-3 desaturase *FAD3* expression.** **a**, Expression of GFP-tagged *FAD3* protein *in vitro*. Subnuclear localization confirmed its high expression in the ER. Scale bar for all micrographs, 10  $\mu\text{m}$ . Three times of each experiment was repeated independently. **b**, GC-MS analysis of fatty acid accumulation in the yeast expression products. From top left to bottom right: transgenic yeast pY31, transgenic yeast pY33, transgenic yeast pY34, GFP-transgenic yeast pYgfp, yeast empty vector INVSc1, structure of the new product. The individual peaks are labelled as 1, C16:0, 2, C16:1, 3, C18:0, 4, C18:1 $\Delta^9$ , 5, IS, 6, C18:2 $\Delta^{9,12}$  and 7, C18:3 $\Delta^{9,12,15}$ .



a

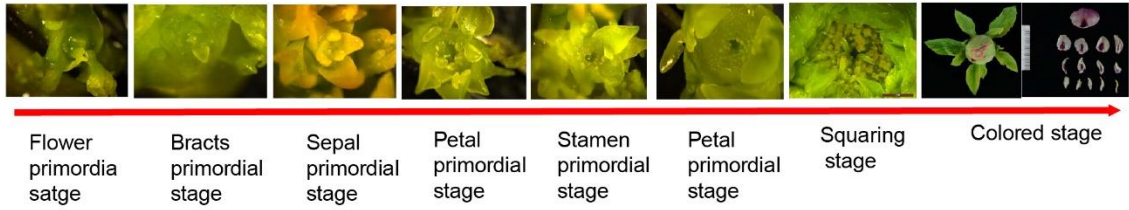

b

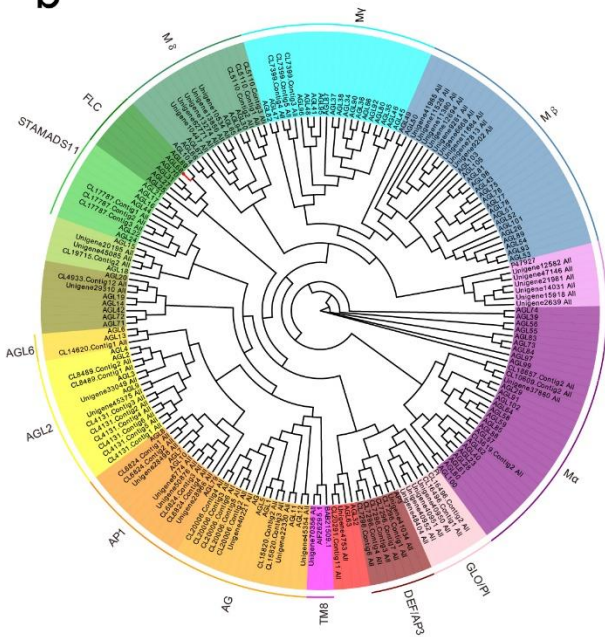

c

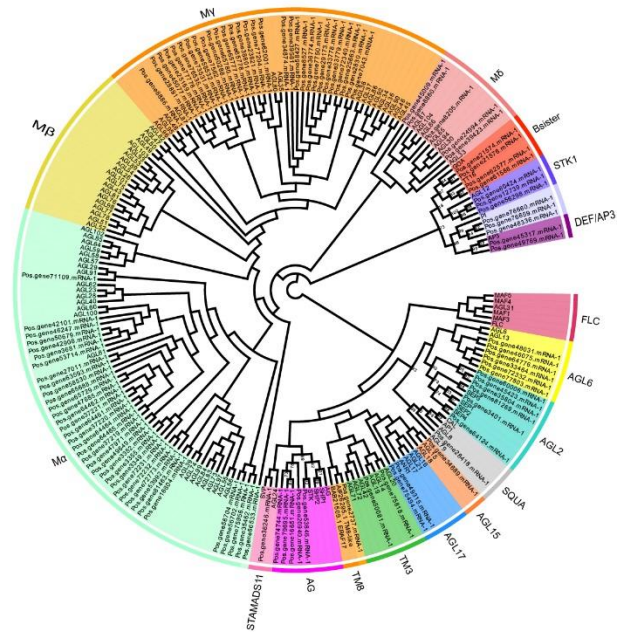

d

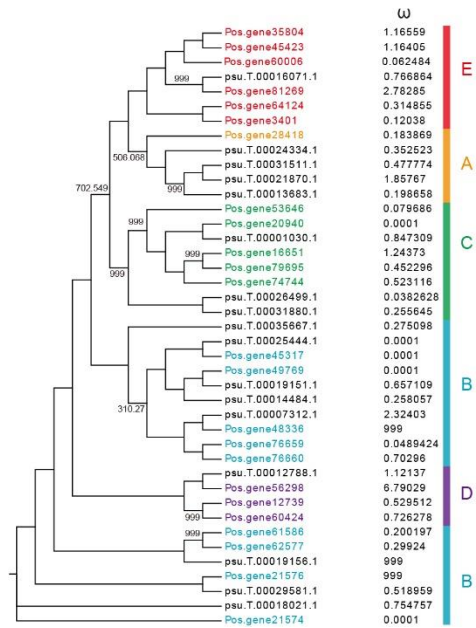

**Supplementary Fig. 11. Petaloid-stamens of *P. ostii*.** **a**, Flowering differentiation and development in *P. suffruticosa*. **b**, Phylogenetic tree of genes in the ABCE model identified from *P. suffruticosa* transcriptomic data based on Bayesian methods. **c**, Phylogenetic analysis of *MADS-box* genes in *P. ostii* with RAxML methods. **d**, The rate of evolution of ABCE genes in *P. ostii* and *P. suffruticosa*. Source data are provided as a Source Data file.

a

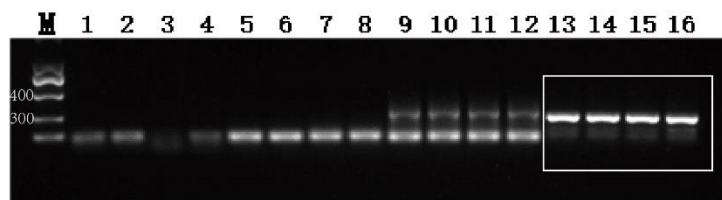

b

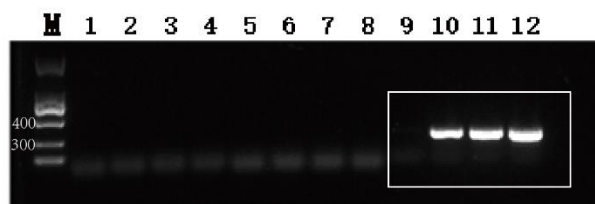

c

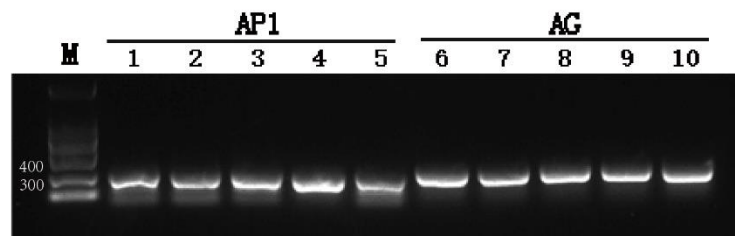

d

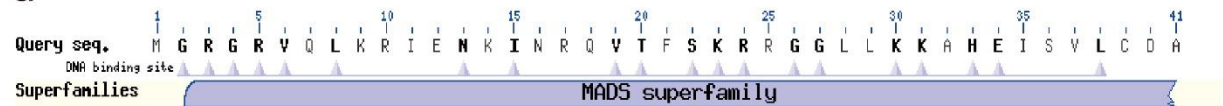

e

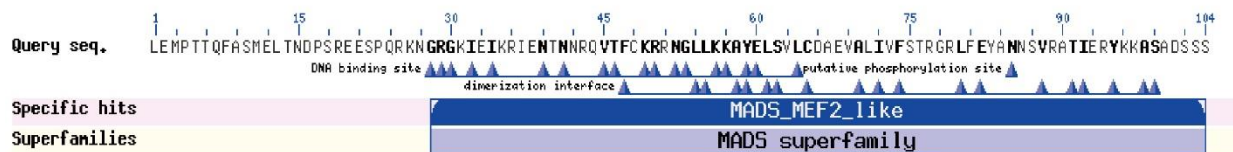

**Supplementary Fig. 12. Cloning *PoAP1* and *PoAG* from *P. suffruticosa*.** **a**, Agarose gel electrophoresis analysis of *PoAP1* (lanes 13-16). Three times of each experiment was repeated independently. **b**, Agarose gel electrophoresis analysis of *PoAG* (lanes 10-12). Three times of each experiment was repeated independently. **c**, Bacterial liquid PCR screening of positive clones of *PoAP1* and *PoAG*. Three times of each experiment was repeated independently. **d**, Domain analysis of the *PoAP1* cloning fragment. **e**, Domain analysis of the *PoAG* cloning fragment. M, DNA marker DL1000.

**Supplementary Table 1. Statistics of Illumina sequencing data.**

| <b>Clean reads length(bp)</b> | <b>Clean data(bp)</b> | <b>Depth(X)</b> |
|-------------------------------|-----------------------|-----------------|
| 100                           | 74,390,370,000        | 6.19            |
| 125                           | 257,499,996,500       | 21.44           |
| 125                           | 246,291,814,500       | 20.51           |
| 125                           | 165,689,612,000       | 13.79           |
| 230                           | 469,803,490,302       | 39.12           |
| 230                           | 451,138,298,378       | 37.56           |
| 49                            | 305,980,362,212       | 25.48           |
| 49                            | 398,447,818,076       | 33.18           |
| 49                            | 195,335,363,902       | 16.26           |
| 49                            | 241,475,980,466       | 20.1            |
| 49                            | 168,412,894,650       | 14.02           |
|                               | 2,974,466,000,986     | 247             |

**Supplementary Table 2. Statistics of PacBio SMRT sequencing data.**

| <b>PacBio<br/>SMRT seq</b> | <b>Total bases<br/>(Gb)</b> | <b>Average read<br/>length (bp)</b> | <b>N50<br/>length</b> | <b>Quality</b> | <b>Depth (X)</b> |
|----------------------------|-----------------------------|-------------------------------------|-----------------------|----------------|------------------|
| <b>RSII</b>                | 277.64                      | 9,122                               | 11,882                | 85%            | 23.12            |
| <b>Sequel</b>              | 366.03                      | 11,114                              | 17,315                | 85%            | 30.48            |
| <b>Total</b>               | 643.67                      | 10,118                              | 14,598                | 85%            | 53.6             |

**Supplementary Table 3. Statistics of Hi-C sequencing data.**

| <b>Library</b> | <b>Reads</b>  | <b>Bases(Gb)</b> |
|----------------|---------------|------------------|
| <b>MuDan1</b>  | 493,949,008   | 148.18           |
| <b>MuDan14</b> | 501,130,687   | 150.34           |
| <b>MuDan15</b> | 493,013,302   | 147.9            |
| <b>MuDan2</b>  | 500,858,291   | 150.26           |
| <b>MuDan22</b> | 491,109,060   | 147.33           |
| <b>MuDan22</b> | 883,333,067   | 265              |
| <b>MuDan22</b> | 3,577,983,239 | 1073.39          |
| <b>MuDan3</b>  | 499,220,075   | 149.77           |
| <b>Total</b>   | 8,323,929,796 | 2497.18          |

**Supplementary Table 4. Statistics of assembly results with only Illumina data.**

|                                  | <b>Contig</b>   |               | <b>Scaffold</b> |               |
|----------------------------------|-----------------|---------------|-----------------|---------------|
|                                  | <b>Size(bp)</b> | <b>Number</b> | <b>Size(bp)</b> | <b>Number</b> |
| <b>N90</b>                       | 953             | 3,499,042     | 1,719           | 831,674       |
| <b>N80</b>                       | 1,487           | 2,449,365     | 6,583           | 370,597       |
| <b>N70</b>                       | 2,139           | 1,744,777     | 14,165          | 212,051       |
| <b>N60</b>                       | 2,971           | 1,247,300     | 25,234          | 131,571       |
| <b>N50</b>                       | 3,923           | 880,475       | 40,128          | 83,430        |
| <b>Longest</b>                   | 74,358          | -             | 859,102         | -             |
| <b>Total length</b>              | 12,531,002,549  | -             | 15,273,082,638  | -             |
| <b>Total number(&gt;=100bp)</b>  | -               | 5,621,609     | -               | 2,512,319     |
| <b>Total number(&gt;=2000bp)</b> | -               | 1,861,113     | -               | 734,024       |
| <b>GC rate</b>                   | 0.444           | -             | 0.291           | -             |

**Supplementary Table 5. Statistics of assembly results with only PacBio data.**

|                                  | <b>Contig</b>   |               | <b>Scaffold</b> |               |
|----------------------------------|-----------------|---------------|-----------------|---------------|
|                                  | <b>Size(bp)</b> | <b>Number</b> | <b>Size(bp)</b> | <b>Number</b> |
| <b>N90</b>                       | 41,010          | 80,832        | 41,010          | 80,832        |
| <b>N80</b>                       | 79,429          | 55,382        | 79,429          | 55,382        |
| <b>N70</b>                       | 116,779         | 40,027        | 116,779         | 40,027        |
| <b>N60</b>                       | 157,008         | 29,048        | 157,008         | 29,048        |
| <b>N50</b>                       | 202,017         | 20,692        | 202,017         | 20,692        |
| <b>Longest</b>                   | 2,255,483       | -             | 2,255,483       | -             |
| <b>Total length</b>              | 14,887,887,589  | -             | 14,887,887,589  | -             |
| <b>Total number(&gt;=100bp)</b>  | -               | 173,510       | -               | 173,510       |
| <b>Total number(&gt;=2000bp)</b> | -               | 173,510       | -               | 173,510       |
| <b>GC rate</b>                   | 0.325           | -             | 0.325           | -             |



**Supplementary Table 6. Statistics of assembly results with Illumina data and PacBio data.**

|                                  | <b>Contig</b>   |               | <b>Scaffold</b> |               |
|----------------------------------|-----------------|---------------|-----------------|---------------|
|                                  | <b>Size(bp)</b> | <b>Number</b> | <b>Size(bp)</b> | <b>Number</b> |
| <b>N90</b>                       | 52,999          | 56,804        | 537,246         | 8,294         |
| <b>N80</b>                       | 95,741          | 39,886        | 794,418         | 6,392         |
| <b>N70</b>                       | 137,070         | 29,204        | 1,018,147       | 5,002         |
| <b>N60</b>                       | 181,553         | 21,434        | 1,208,328       | 3,870         |
| <b>N50</b>                       | 230,474         | 15,430        | 1,411,215       | 2,908         |
| <b>Longest</b>                   | 2,235,459       | -             | 8,263,262       | -             |
| <b>Total length</b>              | 12,276,358,983  | -             | 12,553,866,585  | -             |
| <b>Total number(&gt;=100bp)</b>  | -               | 117,510       | -               | 12,779        |
| <b>Total number(&gt;=2000bp)</b> | -               | 117,206       | -               | 12,779        |
| <b>GC rate</b>                   | 0.328           | -             | 0.321           | -             |

**Supplementary Table 7. Statistics of assembly results incorporated with Hi-C data.**

|                                  | <b>Contig</b>   |               | <b>Scaffold</b> |               |
|----------------------------------|-----------------|---------------|-----------------|---------------|
|                                  | <b>Size(bp)</b> | <b>Number</b> | <b>Size(bp)</b> | <b>Number</b> |
| <b>N90</b>                       | 52,842          | 57,224        | 1,784,695,063   | 5             |
| <b>N80</b>                       | 95,212          | 40,237        | 1,784,695,063   | 5             |
| <b>N70</b>                       | 136,089         | 29,494        | 2,248,995,167   | 4             |
| <b>N60</b>                       | 180,049         | 21,667        | 2,432,486,241   | 3             |
| <b>N50</b>                       | 228,382         | 15,612        | 2,432,486,241   | 3             |
| <b>Longest</b>                   | 2,235,459       | -             | 2,562,065,589   | -             |
| <b>Total length</b>              | 12,276,358,983  | -             | 12,332,046,983  | -             |
| <b>Total number(&gt;=100bp)</b>  | -               | 117,978       |                 | 6,602         |
| <b>Total number(&gt;=2000bp)</b> | -               | 117,674       |                 | 6,315         |
| <b>GC rate</b>                   | 0.328           | -             | 0.326           |               |

**Supplementary Table 8. Genome completion evaluation using Benchmarking Universal Single-Copy Orthologs (BUSCO) analysis.**

|                                   | <b>Complete BUSCOs</b> | <b>Fragmented BUSCOs</b> | <b>Missing BUSCOs</b> |
|-----------------------------------|------------------------|--------------------------|-----------------------|
| <b>Hybrid corrected scaffolds</b> | 1298 (90.1%)           | 62 (4.3%)                | 80 (5.6%)             |

**Supplementary Table 9. Genome completion evaluation using Illumina read mapping rates.**

| <b>PE library</b> | <b>Lane</b> | <b>Mapped reads</b> | <b>Total reads</b> | <b>Mapped reads percent (%)</b> |
|-------------------|-------------|---------------------|--------------------|---------------------------------|
| <b>180bp</b>      | DES00030_L1 | 116,282,738         | 130,875,722        | 88.85                           |
| <b>300bp</b>      | DES00033_L6 | 66,871,214          | 75,913,650         | 88.09                           |
| <b>500bp</b>      | DES00015_L4 | 80,661,596          | 93,691,966         | 86.09                           |
| <b>Total</b>      | ----        | 263,815,548         | 300,481,338        | 87.8                            |

**Supplementary Table 10. Statistics of Illumina transcriptome sequencing data.**

| <b>Sample</b> | <b>Total raw reads (Mb)</b> | <b>Total clean reads (Mb)</b> | <b>Total clean bases (Gb)</b> | <b>Clean reads Q20 (%)</b> | <b>Clean reads Q30 (%)</b> | <b>Clean reads ratio (%)</b> |
|---------------|-----------------------------|-------------------------------|-------------------------------|----------------------------|----------------------------|------------------------------|
| <b>Apical</b> | 70.47                       | 70.34                         | 10.55                         | 87.72                      | 73.84                      | 99.82                        |
| <b>Carpel</b> | 67.78                       | 67.61                         | 10.14                         | 86.95                      | 72.93                      | 99.75                        |
| <b>Leaf</b>   | 65.54                       | 65.45                         | 9.82                          | 90.55                      | 78.45                      | 99.85                        |
| <b>Petal</b>  | 67.4                        | 67.25                         | 10.09                         | 88.34                      | 75.55                      | 99.78                        |
| <b>Pistil</b> | 60.93                       | 60.79                         | 9.12                          | 88.34                      | 75.64                      | 99.76                        |
| <b>Seed</b>   | 74.27                       | 74.14                         | 11.12                         | 87.8                       | 74.09                      | 99.82                        |
| <b>Stamen</b> | 69.96                       | 69.81                         | 10.47                         | 89.45                      | 77.19                      | 99.79                        |
| <b>Stem</b>   | 70.26                       | 70.1                          | 10.52                         | 88.85                      | 76.41                      | 99.77                        |

**Supplementary Table 11. Genome completion evaluation using mapping coverage of the transcriptome.**

| <b>Resource type</b> | <b>Tissue</b> | <b>Insert size</b> | <b>Number of reads pairs (Mb)</b> | <b>Percent aligned</b> |
|----------------------|---------------|--------------------|-----------------------------------|------------------------|
| <b>Illumina, PE</b>  | Apical        | 446                | 76.65                             | 78.73%                 |
| <b>Illumina, PE</b>  | Carpel        | 502                | 57.56                             | 79.45%                 |
| <b>Illumina, PE</b>  | Leaf          | 474                | 49.15                             | 80.58%                 |
| <b>Illumina, PE</b>  | Petal         | 485                | 41.31                             | 80.52%                 |
| <b>Illumina, PE</b>  | Pistil        | 489                | 45.02                             | 79.72%                 |
| <b>Illumina, PE</b>  | Seed          | 464                | 68.6                              | 78.50%                 |
| <b>Illumina, PE</b>  | Stamen        | 471                | 47.43                             | 80.14%                 |
| <b>Illumina, PE</b>  | Stem          | 480                | 45.4                              | 80.89%                 |

**Supplementary Table 12. Statistics of the five assembled chromosomes of *P. ostii*.**

| <b>Chromosome</b> | <b>Length (bp)</b> |
|-------------------|--------------------|
| <b>Chr01</b>      | 2,562,065,589      |
| <b>Chr02</b>      | 2,248,995,167      |
| <b>Chr03</b>      | 1,784,695,063      |
| <b>Chr04</b>      | 2,46,5308,516      |
| <b>Chr05</b>      | 2,432,486,241      |

Supplementary Table 13. Statistics of gene annotation of *P. ostii*.

| Gene set                                         | Number of genes | Average gene length (bp) | Average CDS length (bp) | Average exon per gene | Average exon length (bp) | Average intron length (bp) |
|--------------------------------------------------|-----------------|--------------------------|-------------------------|-----------------------|--------------------------|----------------------------|
| <i>Arabidopsis thaliana</i>                      | 62,725          | 5858.23                  | 671.78                  | 2.18                  | 307.99                   | 4390.82                    |
| <i>Carica papaya</i>                             | 62,613          | 5726.6                   | 555.06                  | 2.29                  | 241.87                   | 3993.76                    |
| <i>Malus x domestica</i>                         | 58,511          | 6827.31                  | 607.62                  | 2.49                  | 243.71                   | 4165.23                    |
| <i>Kalanchoe fedtschenkoi</i>                    | 61,539          | 5735.25                  | 560.98                  | 2.33                  | 241.21                   | 3903.11                    |
| <i>Vitis vinifera</i>                            | 57,794          | 6804.56                  | 597.93                  | 2.7                   | 221.26                   | 3645.91                    |
| RNA-Seq                                          | 57,566          | 11334.86                 | 1707.76                 | 4.62                  | 369.84                   | 2661.19                    |
| Iso-Seq                                          | 27,576          | 11484.47                 | 1895.76                 | 5.05                  | 375.14                   | 2365.54                    |
| Final gene set                                   | 73,177          | 8222.43                  | 794.61                  | 4.63                  | 203.68                   | 2001.82                    |
| High confidence genes                            | 55,998          | 8195.43                  | 858.22                  | 4.71                  | 218.4                    | 1927.52                    |
| Low confidence genes                             | 17,179          | 8310.4                   | 587.26                  | 4.37                  | 151.91                   | 2268.98                    |
| High confidence genes anchored to the chromosome | 54,451          | 7760.1                   | 852.17                  | 4.65                  | 220.54                   | 1843.81                    |
| Low confidence genes anchored to the chromosome  | 16,244          | 7466.19                  | 569.16                  | 4.25                  | 151.73                   | 2100.67                    |



**Supplementary Table 14. Statistics of gene functional annotation of *P. ostii*.**

|                                           | <b>Number</b>    | <b>Percent (%)</b> |        |
|-------------------------------------------|------------------|--------------------|--------|
| <b>Total genes anchored to chromosome</b> | 70,695           | /                  |        |
| <b>InterPro</b>                           | 53,256           | 75.33%             |        |
| <b>GO</b>                                 | 33,541           | 47.44%             |        |
| <b>Annotated</b>                          | <b>KEGG</b>      | 45,399             | 64.22% |
|                                           | <b>Swissprot</b> | 46,857             | 66%    |
|                                           | <b>TrEMBL</b>    | 58,258             | 82.41% |
|                                           | <b>Nr</b>        | 58,844             | 83.24% |
|                                           | <b>KOG</b>       | 46,376             | 65.60% |
| <b>Total annotated</b>                    | 59,768           | 84.54%             |        |

**Supplementary Table 15. Evaluation of gene set using BUSCO single-copy orthologs.**

| <b>Type</b>                         | <b>Number</b> | <b>Ratio</b> |
|-------------------------------------|---------------|--------------|
| <b>Complete BUSCOs (C)</b>          | 1,231         | 85.50%       |
| Complete and single-copy BUSCOs (S) | 1,138         | 79.00%       |
| Complete and duplicated BUSCOs (D)  | 93            | 6.50%        |
| <b>Fragmented BUSCOs (F)</b>        | 91            | 6.30%        |
| <b>Missing BUSCOs (M)</b>           | 118           | 8.20%        |
| <b>Total BUSCO groups searched</b>  | 1,440         | /            |

Supplementary Table 16. Significantly enriched KEGG pathway of *P. ostii* unique gene families (Q value < 0.01).

| Pathway                                      | Sample<br>11,586 | Background<br>42,764 | <i>P</i> -value | <i>Q</i> -value | Pathway ID |
|----------------------------------------------|------------------|----------------------|-----------------|-----------------|------------|
| Ribosome biogenesis in eukaryotes            | 257              | 595                  | 3.62E-23        | 4.52E-21        | ko03008    |
| Ubiquitin mediated proteolysis               | 332              | 856                  | 3.77E-20        | 2.36E-18        | ko04120    |
| ABC transporters                             | 206              | 508                  | 2.57E-15        | 9.18E-14        | ko02010    |
| Other types of <i>O</i> -glycan biosynthesis | 78               | 139                  | 2.94E-15        | 9.18E-14        | ko00514    |
| Ribosome                                     | 791              | 2583                 | 1.78E-12        | 4.46E-11        | ko03010    |
| Isoflavonoid biosynthesis                    | 48               | 87                   | 1.29E-09        | 2.68E-08        | ko00943    |
| Flavonoid biosynthesis                       | 109              | 263                  | 1.93E-09        | 3.45E-08        | ko00941    |
| Biotin metabolism                            | 58               | 115                  | 2.62E-09        | 4.09E-08        | ko00780    |
| Fatty acid biosynthesis                      | 111              | 275                  | 8.11E-09        | 1.13E-07        | ko00061    |
| Fatty acid degradation                       | 99               | 260                  | 1.27E-06        | 1.59E-05        | ko00071    |
| Benzoxazinoid biosynthesis                   | 36               | 71                   | 2.20E-06        | 2.50E-05        | ko00402    |
| Fatty acid metabolism                        | 152              | 440                  | 2.48E-06        | 2.58E-05        | ko01212    |
| Glycolysis / Gluconeogenesis                 | 209              | 661                  | 3.51959E-05     | 3.38E-04        | ko00010    |
| Alpha-linolenic acid metabolism              | 98               | 298                  | 0.000938886     | 8.38E-03        | ko00592    |

Supplementary Table 17. Significantly enriched KEGG pathway of *P. ostii* expanded gene families (*Q* value < 0.01).

| Pathway                                     | Sample<br>1,391 | Background<br>42,764 | <i>P</i> -value | <i>Q</i> -value | Pathway ID |
|---------------------------------------------|-----------------|----------------------|-----------------|-----------------|------------|
| Pyrimidine metabolism                       | 96              | 834                  | 7.65E-27        | 6.04E-25        | ko00240    |
| RNA polymerase                              | 66              | 467                  | 1.18E-23        | 4.64E-22        | ko03020    |
| Sulfur metabolism                           | 29              | 115                  | 5.00E-18        | 1.32E-16        | ko00920    |
| Metabolic pathways                          | 472             | 10264                | 1.33E-17        | 2.62E-16        | ko01100    |
| Tryptophan metabolism                       | 39              | 234                  | 5.37E-17        | 8.48E-16        | ko00380    |
| Photosynthesis                              | 68              | 697                  | 1.25E-15        | 1.65E-14        | ko00195    |
| Oxidative phosphorylation                   | 107             | 1501                 | 3.69E-14        | 4.17E-13        | ko00190    |
| Linoleic acid metabolism                    | 26              | 126                  | 4.62E-14        | 4.56E-13        | ko00591    |
| RNA degradation                             | 62              | 693                  | 1.06E-12        | 9.30E-12        | ko03018    |
| Caffeine metabolism                         | 10              | 17                   | 2.03E-11        | 1.60E-10        | ko00232    |
| Purine metabolism                           | 67              | 847                  | 3.26E-11        | 2.34E-10        | ko00230    |
| Protein processing in endoplasmic reticulum | 89              | 1390                 | 1.35E-09        | 8.86E-09        | ko04141    |
| Arachidonic acid metabolism                 | 16              | 124                  | 2.89E-06        | 1.76E-05        | ko00590    |
| DNA replication                             | 26              | 307                  | 1.03E-05        | 5.80E-05        | ko03030    |
| Fatty acid elongation                       | 14              | 118                  | 3.11E-05        | 1.64E-04        | ko00062    |
| Mismatch repair                             | 16              | 166                  | 0.00011221      | 5.54E-04        | ko03430    |
| Glyoxylate and dicarboxylate metabolism     | 31              | 480                  | 0.000271767     | 1.26E-03        | ko00630    |

|                                                    |    |     |             |          |         |
|----------------------------------------------------|----|-----|-------------|----------|---------|
| <b>Carbon fixation in photosynthetic organisms</b> | 34 | 554 | 0.000360454 | 1.58E-03 | ko00710 |
| <b>N-Glycan biosynthesis</b>                       | 13 | 135 | 0.000481597 | 2.00E-03 | ko00510 |
| <b>Spliceosome</b>                                 | 52 | 990 | 0.000564423 | 2.18E-03 | ko03040 |
| <b>Phenylalanine metabolism</b>                    | 18 | 230 | 0.000580427 | 2.18E-03 | ko00360 |
| <b>Ubiquitin mediated proteolysis</b>              | 44 | 856 | 0.002165832 | 7.78E-03 | ko04120 |

---

**Supplementary Table 18. Statistics of Non-coding RNA annotation of *P. ostii*.**

|              | Type            | Copy   | Average length(bp) | Total length(bp) | % of genome |
|--------------|-----------------|--------|--------------------|------------------|-------------|
|              | <b>miRNA</b>    | 122    | 126.51             | 15,434           | 0.000123    |
|              | <b>tRNA</b>     | 3,381  | 74.47              | 251,784          | 0.002006    |
|              | <b>rRNA</b>     | 17,284 | 105.25             | 1,819,163        | 0.014491    |
|              | <b>18S</b>      | 481    | 1009.19            | 485,419          | 0.003867    |
| <b>rRNA</b>  | <b>28S</b>      | 1,005  | 130.05             | 130,701          | 0.001041    |
|              | <b>5.8S</b>     | 276    | 148.84             | 41,081           | 0.000327    |
|              | <b>5S</b>       | 15,522 | 74.86              | 1,161,962        | 0.009256    |
|              | <b>snRNA</b>    | 2,030  | 130.94             | 265,803          | 0.002117    |
|              | <b>CD-box</b>   | 724    | 104                | 75,293           | 0.0006      |
| <b>snRNA</b> | <b>HACA-box</b> | 94     | 126.7              | 11,910           | 0.000095    |
|              | <b>splicing</b> | 1,212  | 147.36             | 178,600          | 0.001423    |

**Supplementary Table 19. Comparison of gene families clustered by OrthoMCL in 13 species.**

| <b>Species</b>                | <b>Number of genes</b> | <b>Genes in families</b> | <b>Unclustered genes</b> | <b>Number of gene families</b> | <b>Unique families</b> | <b>Average genes per family</b> |
|-------------------------------|------------------------|--------------------------|--------------------------|--------------------------------|------------------------|---------------------------------|
| <i>Paeonia ostii</i>          | 54432                  | 34798                    | 19634                    | 15238                          | 3098                   | 2.28                            |
| <i>Arabidopsis thaliana</i>   | 27342                  | 23659                    | 3683                     | 12602                          | 612                    | 1.88                            |
| <i>Vitis vinifera</i>         | 29385                  | 22991                    | 6394                     | 13747                          | 661                    | 1.67                            |
| <i>Kalanchoe fedtschenkoi</i> | 30964                  | 25386                    | 5578                     | 13992                          | 528                    | 1.81                            |
| <i>Amborella trichopoda</i>   | 25628                  | 19183                    | 6445                     | 12340                          | 869                    | 1.55                            |
| <i>Aquilegia coerulea</i>     | 30023                  | 24326                    | 5697                     | 13469                          | 917                    | 1.81                            |
| <i>Carica papaya</i>          | 27681                  | 20839                    | 6842                     | 13529                          | 563                    | 1.54                            |
| <i>Jatropha curcas</i>        | 43885                  | 37548                    | 6337                     | 14210                          | 1221                   | 2.64                            |
| <i>Solanum lycopersicum</i>   | 34726                  | 26596                    | 8130                     | 13881                          | 896                    | 1.92                            |
| <i>Nelumbo nucifera</i>       | 40348                  | 28743                    | 11605                    | 14606                          | 1242                   | 1.97                            |
| <i>Actinidia chinensis</i>    | 39040                  | 27330                    | 11710                    | 13226                          | 1059                   | 2.07                            |
| <i>Rhodiolacrenulata</i>      | 31517                  | 24225                    | 7292                     | 13281                          | 775                    | 1.82                            |
| <i>Helianthus annuus</i>      | 52213                  | 39851                    | 12362                    | 14744                          | 2148                   | 2.7                             |

Note: Un-clustered genes refer to special gene of current species; Unique families refer to special gene families of current species.

**Supplementary Table 20. List of sequenced plant species with megagenome over 10G.**

| <b>Class</b>         | <b>Latin name</b>        | <b>Common name</b>         | <b>Genome size (Mb)</b> | <b>WGD event</b> | <b>Reference</b> |
|----------------------|--------------------------|----------------------------|-------------------------|------------------|------------------|
| <b>coniferophyt</b>  | <i>Pinus lambertiana</i> | Sugar pine                 | 31000                   | No information   | 1                |
| <b>coniferophyt</b>  | <i>Pinus taeda</i>       | Loblolly pine              | 21600                   | No information   | 2                |
| <b>coniferophyt</b>  | <i>Picea abies</i>       | Norway spruce              | 19700                   | No recent WGD    | 3                |
| <b>coniferophyt</b>  | <i>Abies alba</i>        | European silver fir        | 17360                   | No information   | 4                |
| <b>monocotyledon</b> | <i>Triticum aestivum</i> | Bread wheat, AABBDD-genome | 17000                   | No information   | 5                |
| <b>monocotyledon</b> | <i>Triticum aestivum</i> | Bread wheat, AABBDD-genome | 17000                   | No information   | 6                |
| <b>monocotyledon</b> | <i>Triticum aestivum</i> | Bread wheat, AABBDD-genome | 17000                   | No information   | 7                |



|                      |                               |                         |       |                               |    |
|----------------------|-------------------------------|-------------------------|-------|-------------------------------|----|
| <b>coniferophyt</b>  | <i>Pseudotsuga menziesii</i>  | Douglas-fir             | 16100 | No information                | 8  |
| <b>monocotyledon</b> | <i>Allium sativum</i>         | Garlic                  | 16000 | Three WGD events              | 9  |
| <b>monocotyledon</b> | <i>Aloe vera</i>              | True aloe               | 14000 | No information                | 10 |
| <b>rosid</b>         | <i>Paeonia suffruticosa</i>   | Moutan peony            | 13800 | No information                | 11 |
| <b>monocotyledon</b> | <i>Triticum turgidum</i>      | Wild emmer, AABB-genome | 12000 | No information                | 12 |
| <b>monocotyledon</b> | <i>Triticum turgidum</i>      | Wild emmer, AABB-genome | 12000 | No information                | 13 |
| <b>monocotyledon</b> | <i>Triticum turgidum</i>      | Wild emmer, AABB-genome | 12000 | No information                | 14 |
| <b>coniferophyt</b>  | <i>Ginkgo biloba</i>          | Ginkgo tree             | 11750 | An ancient WGD & a recent WGD | 15 |
| <b>charophyt</b>     | <i>Ceratopteris richardii</i> | Triangle waterfern      | 11250 | Three WGD events              | 16 |

---

**Supplementary Table 21. Statistics of recently duplicated gene pairs ( $K_s < 0.2$ ).**

| <b>Types</b>                             | <b>Sub-types</b>                   | <b>Number</b> | <b>Percentage</b> |
|------------------------------------------|------------------------------------|---------------|-------------------|
| <b>Total gene pairs</b>                  | /                                  | 5,294         | 100%              |
| <b>Exon number</b>                       | One single vs One multiple         | 347           | 13.11%            |
|                                          | Both 5' and 3' flanking similar    | 187           | 7.06%             |
| <b>Flanking sequence similarity</b>      | Only 5' flanking similar           | 316           | 11.94%            |
|                                          | Only 3' flanking similar           | 388           | 14.66%            |
|                                          | <b>Total</b>                       | 891           | 33.66%            |
|                                          | Both 5' and 3' flanking overlapped | 2,515 (genes) | 47.51%            |
| <b>Flanking sequence overlap with TE</b> | Only 5' flanking overlapped        | 1,054 (genes) | 19.91%            |
|                                          | Only 3' flanking overlapped        | 1,011 (genes) | 19.10%            |
|                                          | <b>Total</b>                       | 4,580 (genes) | 86.51%            |
| <b>Total</b>                             | /                                  | 4,944 (genes) | 93.39%            |

Supplementary Table 22. Significantly enriched KEGG pathway of *P. ostii* recently duplicated gene pairs with  $K_s < 0.2$  ( $Q$  value  $< 0.01$ ).

| Pathway                            | Sample<br>4,710 | Background<br>44,028 | <i>P</i> -value | <i>Q</i> -value | Pathway ID |
|------------------------------------|-----------------|----------------------|-----------------|-----------------|------------|
| Glutathione metabolism             | 78              | 410                  | 3.53E-07        | 3.74E-05        | ko00480    |
| Isoquinoline alkaloid biosynthesis | 31              | 113                  | 5.93E-07        | 3.74E-05        | ko00950    |
| Tyrosine metabolism                | 50              | 260                  | 3.04E-05        | 1.27E-03        | ko00350    |

**Supplementary Table 23. Statistics of TE content in *P. ostii*.**

|                                 | <b>Number</b> | <b>Length (bp)</b> | <b>% of repeats</b> | <b>% of genome</b> |
|---------------------------------|---------------|--------------------|---------------------|--------------------|
| <b>Class I : Retroelement</b>   |               |                    |                     |                    |
| <b>LTR Retrotransposon</b>      | 5,305,122     | 5,397,346,348      | 64.08%              | 42.99%             |
| Ty1/Copia                       | 488,008       | 447,924,151        | 5.32%               | 3.57%              |
| Ty3/Gypsy                       | 4,736,657     | 4,852,220,121      | 57.61%              | 38.65%             |
| Others                          | 80,457        | 97,202,076         | 1.15%               | 0.77%              |
| <b>Non-LTR Retrotransposon</b>  | 1,164,287     | 1,297,371,684      | 15.40%              | 10.33%             |
| LINE                            | 1,158,633     | 1,289,849,060      | 15.31%              | 10.27%             |
| SINE                            | 5,654         | 7,522,624          | 0.09%               | 0.06%              |
| <b>Class II: DNA transposon</b> | 1,339,206     | 1,441,833,555      | 17.12%              | 11.49%             |
| CMC                             | 1,074,409     | 1,252,447,289      | 14.87%              | 9.98%              |
| Helitron                        | 54,410        | 67,916,038         | 0.81%               | 0.54%              |
| MULE                            | 56,381        | 43,574,750         | 0.52%               | 0.35%              |
| DNA                             | 38,354        | 21,985,718         | 0.26%               | 0.18%              |
| hAT                             | 35,977        | 21,840,392         | 0.26%               | 0.17%              |
| TcMar                           | 27,456        | 13,694,386         | 0.16%               | 0.11%              |
| Others                          | 52,219        | 20,374,982         | 0.24%               | 0.16%              |
| <b>Tandem repeats</b>           | 1,382,437     | 282,282,662        | 3.35%               | 2.25%              |
| <b>Unknown</b>                  | 2,513         | 3,541,817          | 0.04%               | 0.03%              |
| <b>Total repeat</b>             | 9,193,565     | 8,422,376,066      | 100.00%             | 67.09%             |

**Supplementary Table 24. Estimated insertion time of LTR superfamilies.**

| <b>Mya</b> | <b>All</b> | <b>Gypsy (RLG)</b> | <b>Copia (RLC)</b> | <b>Other (RLX)</b> | <b>All%</b> | <b>Gypsy (RLG)%</b> | <b>Copia (RLC)%</b> | <b>Other (RLX)%</b> |
|------------|------------|--------------------|--------------------|--------------------|-------------|---------------------|---------------------|---------------------|
| <b>0</b>   | 298        | 194                | 100                | 6                  | 0.002960108 | 0.002096663         | 0.01304121          | 0.010526316         |
| <b>0.5</b> | 6615       | 6001               | 516                | 99                 | 0.065708439 | 0.064856044         | 0.067292645         | 0.173684211         |
| <b>1</b>   | 14958      | 13846              | 951                | 159                | 0.148581532 | 0.14964119          | 0.124021909         | 0.278947368         |
| <b>1.5</b> | 17148      | 15984              | 1083               | 117                | 0.170335346 | 0.172747709         | 0.141236307         | 0.205263158         |
| <b>2</b>   | 16653      | 15467              | 1167               | 83                 | 0.165418388 | 0.167160211         | 0.152190923         | 0.145614035         |
| <b>2.5</b> | 12928      | 11912              | 986                | 38                 | 0.128417038 | 0.128739409         | 0.128586333         | 0.066666667         |
| <b>3</b>   | 10268      | 9419               | 827                | 26                 | 0.101994596 | 0.101796213         | 0.107850809         | 0.045614035         |
| <b>3.5</b> | 7717       | 7025               | 672                | 19                 | 0.076654879 | 0.075922964         | 0.087636933         | 0.033333333         |
| <b>4</b>   | 5751       | 5217               | 515                | 15                 | 0.057126113 | 0.056382933         | 0.067162233         | 0.026315789         |
| <b>4.5</b> | 3833       | 3478               | 344                | 3                  | 0.038074142 | 0.037588622         | 0.044861763         | 0.005263158         |
| <b>5</b>   | 2385       | 2116               | 261                | 3                  | 0.023690798 | 0.022868753         | 0.034037559         | 0.005263158         |
| <b>5.5</b> | 1249       | 1101               | 146                | 2                  | 0.012406627 | 0.011899101         | 0.019040167         | 0.003508772         |
| <b>6</b>   | 625        | 559                | 66                 | 0                  | 0.00620828  | 0.006041414         | 0.008607199         | 0                   |
| <b>6.5</b> | 221        | 187                | 33                 | 0                  | 0.002195248 | 0.00202101          | 0.004303599         | 0                   |
| <b>7</b>   | 23         | 22                 | 1                  | 0                  | 0.000228465 | 0.000237766         | 0.000130412         | 0                   |

Supplementary Table 25. Statistics of flanking regions of H3.1 genes overlapping with TEs.

| Gene          | TE type |      |      |    |
|---------------|---------|------|------|----|
| Pos.gene35945 |         |      |      |    |
| Pos.gene69301 |         |      |      |    |
| Pos.gene69409 | LTR     |      |      |    |
| Pos.gene54975 | LTR     |      |      |    |
| Pos.gene9181  | LTR     |      |      |    |
| Pos.gene62825 | LTR     |      |      |    |
| Pos.gene61792 | LTR     |      |      |    |
| Pos.gene32751 | LTR     |      |      |    |
| Pos.gene3371  | LINE    |      |      |    |
| Pos.gene25399 | LINE    |      |      |    |
| Pos.gene40934 | DNA     |      |      |    |
| Pos.gene43908 | DNA     |      |      |    |
| Pos.gene20873 | DNA     |      |      |    |
| Pos.gene33719 | LTR     | DNA  |      |    |
| Pos.gene13446 | LTR     | DNA  |      |    |
| Pos.gene3374  | LTR     | DNA  |      |    |
| Pos.gene47467 | LTR     | DNA  |      |    |
| Pos.gene20246 | LTR     | DNA  |      |    |
| Pos.gene5247  | LTR     | DNA  |      |    |
| Pos.gene28058 | LTR     | DNA  |      |    |
| Pos.gene83610 | LTR     | DNA  |      |    |
| Pos.gene8253  | LTR     | DNA  |      |    |
| Pos.gene47462 | LTR     | LINE |      |    |
| Pos.gene24155 | LTR     | DNA  | LINE |    |
| Pos.gene36610 | LTR     | DNA  | LINE |    |
| Pos.gene71337 | LTR     | DNA  | LINE |    |
| Pos.gene79909 | LTR     | DNA  | LINE |    |
| Pos.gene32755 | LTR     | DNA  | LINE |    |
| Pos.gene69412 | LTR     | DNA  | LINE |    |
| Pos.gene35983 | LTR     | DNA  | LINE |    |
| Pos.gene8807  | LTR     | DNA  | LINE |    |
| Pos.gene55478 | LTR     | DNA  | LINE |    |
| Pos.gene54974 | LTR     | DNA  | LINE |    |
| Pos.gene61791 | LTR     | DNA  | LINE |    |
| Pos.gene69414 | RC      | DNA  | LINE |    |
| Pos.gene46122 | LTR     | RC   | LINE |    |
| Pos.gene30188 | LTR     | DNA  | LINE | RC |
| Pos.gene27552 | LTR     | DNA  | LINE | RC |

**Supplementary Table 26. Statistics of *P.ostii* traits in individual years.**

| Trait name                                                                                                               | Short name   | 2016                | 2017                | 2018                | 2019                | Mean                |
|--------------------------------------------------------------------------------------------------------------------------|--------------|---------------------|---------------------|---------------------|---------------------|---------------------|
| <b>Content of alpha-linolenic acid (C18:3<math>\Delta^9,12,15</math>)</b>                                                | ALA          | 114.2 $\pm$ 25.89   | 128.52 $\pm$ 39.64  | 67.48 $\pm$ 21.42   | 133.99 $\pm$ 57.88  | 109.24 $\pm$ 19.8   |
| <b>Content of linoleic acid (C18:2<math>\Delta^9,12</math>)</b>                                                          | LA           | 74.31 $\pm$ 18.95   | 62.96 $\pm$ 17.04   | 42.44 $\pm$ 15.14   | 68.08 $\pm$ 28.73   | 59.71 $\pm$ 10.82   |
| <b>Content of oleic acid (C18:1<math>\Delta^9</math>)</b>                                                                | OA           | 55.62 $\pm$ 11.41   | 44.25 $\pm$ 8.43    | 34.33 $\pm$ 10.79   | 48.14 $\pm$ 17.34   | 44.21 $\pm$ 5.96    |
| <b>Content of steric acid (C18:0)</b>                                                                                    | SA           | 2.95 $\pm$ 0.77     | 3.55 $\pm$ 0.9      | 3.34 $\pm$ 1.09     | 2.86 $\pm$ 1.17     | 3.14 $\pm$ 0.57     |
| <b>Content of palmitic acid (C16:0)</b>                                                                                  | PA           | 11.71 $\pm$ 4.09    | 9.81 $\pm$ 1.62     | 10.59 $\pm$ 4.19    | 10.62 $\pm$ 3.47    | 10.42 $\pm$ 1.48    |
| <b>Content of multiple fatty acids<br/>(PA<math>\pm</math>SA<math>\pm</math>OA<math>\pm</math>LA<math>\pm</math>ALA)</b> | MFA          | 258.77 $\pm$ 53.66  | 249.09 $\pm$ 54.05  | 144.26 $\pm$ 44.83  | 263.67 $\pm$ 100.53 | 226.02 $\pm$ 36.85  |
| <b>Content of total fatty acids</b>                                                                                      | TFA          | 261.99 $\pm$ 54.38  | 249.09 $\pm$ 54.05  | 159.32 $\pm$ 48.34  | 263.67 $\pm$ 100.53 | 230.75 $\pm$ 37.23  |
| <b>Proportion of C18:2<math>\Delta^9,12</math>/C18:3<math>\Delta^9,12,15</math></b>                                      | LAALA        | 0.6616 $\pm$ 0.1574 | 0.5155 $\pm$ 0.1678 | 0.636 $\pm$ 0.1228  | 0.5361 $\pm$ 0.1517 | 0.5574 $\pm$ 0.1249 |
| <b>C18:1<math>\Delta^9</math>/C18:2<math>\Delta^9,12</math></b>                                                          | C1819C182912 | 0.7709 $\pm$ 0.1457 | 0.7368 $\pm$ 0.1855 | 0.828 $\pm$ 0.1385  | 0.746 $\pm$ 0.1698  | 0.7717 $\pm$ 0.1227 |
| <b>C18:0/C18:1<math>\Delta^9</math></b>                                                                                  | C180C1819    | 0.0542 $\pm$ 0.0137 | 0.083 $\pm$ 0.0266  | 0.1003 $\pm$ 0.0306 | 0.0637 $\pm$ 0.0266 | 0.0812 $\pm$ 0.0332 |
| <b>C16:0/C18:0</b>                                                                                                       | C160C180     | 4.07 $\pm$ 1.42     | -                   | 3.87 $\pm$ 6.83     | -                   | 3.51 $\pm$ 0.91     |
| <b>Content of Unsaturated fatty acids<br/>(OA<math>\pm</math>LA<math>\pm</math>ALA)</b>                                  | UFA          | 243.97 $\pm$ 49.57  | 235.74 $\pm$ 53.03  | 144.26 $\pm$ 44.83  | 250.2 $\pm$ 97.44   | 216.12 $\pm$ 35.89  |
| <b>Content of Saturated fatty acids (PA<math>\pm</math>SA)</b>                                                           | SFA          | 14.65 $\pm$ 4.44    | 13.36 $\pm$ 2.12    | 13.93 $\pm$ 4.63    | 13.47 $\pm$ 4.32    | 13.76 $\pm$ 2.14    |
| <b>Proportion of Unsaturated fatty acids/<br/>Saturated fatty acids</b>                                                  | US           | 17.21 $\pm$ 2.23    | 17.81 $\pm$ 3.64    | 10.54 $\pm$ 2       | 18.66 $\pm$ 5.71    | 15.83 $\pm$ 2.3     |

**Supplementary Table 27. Enriched pathway of differential expressed genes during endosperm maturation.**

| <b>Pathway</b>                                                | <b>Pathway ID</b> | <b>Gene number</b> |
|---------------------------------------------------------------|-------------------|--------------------|
| <b>Alpha-linolenic acid metabolism</b>                        | ko00592           | 17                 |
| <b>Fatty acid biosynthesis</b>                                | ko00061           | 34                 |
| <b>Fatty acid metabolism</b>                                  | ko00071           | 56                 |
| <b>Biosynthesis of unsaturated fatty acids</b>                | ko01040           | 44                 |
| <b>Glycerolipid metabolism</b>                                | ko00561           | 50                 |
| <b>Glycerophospholipid metabolism</b>                         | ko00564           | 65                 |
| <b>Fatty acid elongation in mitochondria</b>                  | ko00062           | 3                  |
| <b>Inositol phosphate metabolism</b>                          | ko00562           | 55                 |
| <b>Glycosyl phosphatidylinositol(GPI)-anchor biosynthesis</b> | ko00563           | 14                 |
| <b>Ether lipid metabolism</b>                                 | ko00565           | 22                 |
| <b>Arachidonic acid metabolism</b>                            | ko00590           | 11                 |
| <b>Sphingolipid metabolism</b>                                | ko00600           | 24                 |
| <b>Glycosphingolipid biosynthesis - globo series</b>          | ko00603           | 10                 |
| <b>Glycosphingolipid biosynthesis - ganglio series</b>        | ko00604           | 4                  |
| <b>Steroid biosynthesis</b>                                   | ko00100           | 27                 |



**Supplementary Table 28. Contents of fatty acids in transgenic yeast grown at different temperature with linoleic acid (LA) added as a substrate at 72 h.**

| Yeast                     | T/°C | Fatty acid |                 |           |                 |                      |                         | % Conversion |
|---------------------------|------|------------|-----------------|-----------|-----------------|----------------------|-------------------------|--------------|
|                           |      | 16:0       | 16:1 $\Delta^9$ | 18:0      | 18:1 $\Delta^9$ | 18:2 $\Delta^{9,12}$ | 18:3 $\Delta^{9,12,15}$ |              |
| <b>pY31</b><br>(PoFAD3_1) | 28   | 19.30±0.09 | 16.46±0.14      | 6.39±0.14 | 11.21±0.06      | 39.73±0.06           | –                       | –            |
|                           | 25   | 10.29±0.06 | 39.28±0.22      | 6.88±0.02 | 32.33±0.21      | 7.04±0.48            | –                       | –            |
|                           | 20   | 10.39±0.50 | 43.84±0.58      | 5.82±0.26 | 29.52±0.23      | 5.06±0.23            | 1.20±0.02               | 19.24±0.83   |
|                           | 15   | 10.98±0.60 | 49.63±0.68      | 3.91±0.22 | 27.25±0.43      | 3.05±0.25            | 2.86±0.25               | 48.38±3.85   |
|                           | 10   | 14.38±0.28 | 41.29±0.11      | 4.42±0.15 | 22.99±0.36      | 11.15±0.19           | 0.93±0.04               | 7.71±0.34    |
|                           | 5    | 15.02±0.17 | 41.72±0.04      | 4.23±0.06 | 20.16±0.01      | 13.34±0.22           | 0.92±0.03               | 6.47±0.11    |
| <b>Py33</b><br>(PoFAD3_3) | 28   | 23.21±0.38 | 5.51±0.21       | 7.23±0.35 | 3.55±0.27       | 51.95±0.13           | –                       | –            |
|                           | 25   | 9.93±0.05  | 38.49±0.16      | 6.25±0.18 | 32.52±0.29      | 8.30±0.28            | –                       | –            |
|                           | 20   | 8.52±0.05  | 43.87±0.56      | 5.54±0.09 | 32.05±0.39      | 4.78±0.08            | 0.61±0.08               | 11.33±1.53   |
|                           | 15   | 11.54±0.25 | 49.27±1.49      | 3.54±0.21 | 28.52±0.76      | 2.94±0.05            | 1.51±0.05               | 34.04±0.71   |
|                           | 10   | 14.47±0.42 | 42.48±1.18      | 4.37±0.32 | 22.32±1.13      | 11.16±0.32           | 0.76±0.01               | 6.36±0.18    |
|                           | 5    | 16.43±0.19 | 39.13±0.37      | 4.55±0.28 | 20.97±0.12      | 14.10±0.19           | 0.46±0.04               | 3.16±0.25    |
| <b>Py34</b><br>(PoFAD3_4) | 28   | 21.08±0.29 | 10.15±0.15      | 6.66±0.32 | 7.19±0.21       | 49.42±1.00           | –                       | –            |
|                           | 25   | 9.89±0.17  | 38.14±0.73      | 6.45±0.34 | 33.02±0.38      | 7.03±0.30            | 1.31±0.03               | 15.73±0.65   |
|                           | 20   | 9.15±0.27  | 43.26±0.65      | 5.56±0.29 | 31.30±0.47      | 2.47±0.15            | 3.47±0.06               | 58.47±1.09   |
|                           | 15   | 12.33±0.32 | 48.69±0.82      | 3.67±0.17 | 27.08±0.62      | 2.33±0.06            | 3.01±0.08               | 56.39±0.27   |
|                           | 10   | 14.67±0.46 | 39.27±0.71      | 5.07±0.12 | 20.95±0.16      | 13.77±0.26           | 1.11±0.05               | 7.45±0.42    |
|                           | 5    | 13.41±0.98 | 41.86±0.16      | 3.97±0.24 | 23.38±0.21      | 11.97±0.65           | 1.26±0.08               | 9.51±0.13    |

## Supplementary references

1. Stevens, K. A. *et al.* Sequence of the sugar pine megagenome. *Genetics* **204**, 1613–1626 (2016).
2. Neale, D. B. *et al.* Decoding the massive genome of loblolly pine using haploid DNA and novel assembly strategies. *Genome Biology* **15**, 1–13 (2014).
3. Nystedt, B. *et al.* The Norway spruce genome sequence and conifer genome evolution. *Nature* **497**, 579–584 (2013).
4. Mosca, E. *et al.* A reference genome sequence for the European silver fir (*Abies alba* Mill.): A community-generated genomic resource. *G3: Genes/Genomes/Genetics* **9**, 2039–2049 (2019).
5. Lukaszewski, A. J. *et al.* A chromosome-based draft sequence of the hexaploid bread wheat (*Triticum aestivum*) genome. *Science* **345**, (2014).
6. Appels, R. *et al.* Shifting the limits in wheat research and breeding using a fully annotated reference genome. *Science* **361**, (2018).
7. Walkowiak, S. *et al.* Multiple wheat genomes reveal global variation in modern breeding. *Nature* **588**, 277–283 (2020).
8. Neale, D. B. *et al.* The Douglas-Fir genome sequence reveals specialization of the photosynthetic apparatus in Pinaceae. *G3: Genes, Genomes, Genetics* **7**, 3157–3167 (2017).
9. Sun, X. *et al.* A chromosome-level genome assembly of garlic (*Allium sativum*) provides insights into genome evolution and allicin biosynthesis. *Molecular Plant* **13**, 1328–1339 (2020).

10. Jaiswal, S. K., Mahajan, S., Chakraborty, A., Kumar, S. & Sharma, V. K. The genome sequence of *Aloe vera* reveals adaptive evolution of drought tolerance mechanisms. *iScience* **24**, (2021).
11. Lv, S. *et al.* Draft genome of the famous ornamental plant *Paeonia suffruticosa*. *Ecology and Evolution* **10**, 4518–4530 (2020).
12. Avni, R. *et al.* Wild emmer genome architecture and diversity elucidate wheat evolution and domestication. *Science* **357**, 93–97 (2017).
13. Zhu, T. *et al.* Improved genome sequence of wild emmer wheat Zavitan with the aid of optical maps. *G3 Genes/Genomes/Genetics* **9**, 619–624 (2019).
14. Maccaferri, M. *et al.* Durum wheat genome highlights past domestication signatures and future improvement targets. *Nature Genetics* **51**, 885–895 (2019).
15. Guan, R. *et al.* Draft genome of the living fossil *Ginkgo biloba*. *GigaScience* **5**, 1–14 (2016).
16. Marchant, D. B. *et al.* The C-Fern (*Ceratopteris richardii*) genome: insights into plant genome evolution with the first partial homosporous fern genome assembly. *Scientific Reports* **9**, 1–14 (2019).
