# Supplementary material for: Genomic basis of the giga-chromosomes and giga-genome of tree peony Paeonia ostii
Source: PubMed Central journal article supplement (PMC9705720; doi:10.1038/s41467-022-35063-1), 2022-11-28
Supplement: 41467_2022_35063_MOESM3_ESM.pdf [file 41467_2022_35063_MOESM3_ESM.pdf]

### **Description of Additional Supplementary Files**

File Name: Supplementary Data 1

Description: Distribution of full-length LTR subtypes in land plants.

File Name: Supplementary Data 2

Description: Statistics of copy number of histones.

File Name: Supplementary Data 3

Description: Statistics of SLAF data.

File Name: Supplementary Data 4

Description: Statistics of number of SNPs and genes related to each trait.

File Name: Supplementary Data 5

Description: List of SAD and FAD2/6 genes used for phylogenetic analysis in *P. ostii* and representative plants.

File Name: Supplementary Data 6

Description: Candidate genes identified by GWAS in accordance to fatty acid biosynthesis related traits.

File Name: Supplementary Data 7

Description: List of genes related to fatty acid biosynthesis and the FPKM values during endosperm maturation.

File Name: Supplementary Data 8

Description: List of and FAD3 and FAD7/8 genes used for phylogenetic analysis in *P. ostii* and representative plants.
